# Supplementary material for: Missed opportunities for vaccination (MOV) in children up to 5 years old in 19 Médecins Sans Frontières-supported health facilities: a cross-sectional survey in six low-resource countries
Source: PubMed Central journal article supplement — BMJ Open. 2022 Jul 26;12(7):e059900. doi: 10.1136/bmjopen-2021-059900 (PMC9330337; doi:10.1136/bmjopen-2021-059900), 2022-07-26
Supplement: bmjopen-2021-059900.draft_revisions.pdf [file bmjopen-2021-059900.draft_revisions.pdf]

# BMJ Open

BMJ Open is committed to open peer review. As part of this commitment we make the peer review history of every article we publish publicly available.

When an article is published we post the peer reviewers' comments and the authors' responses online. We also post the versions of the paper that were used during peer review. These are the versions that the peer review comments apply to.

The versions of the paper that follow are the versions that were submitted during the peer review process. They are not the versions of record or the final published versions. They should not be cited or distributed as the published version of this manuscript.

BMJ Open is an open access journal and the full, final, typeset and author-corrected version of record of the manuscript is available on our site with no access controls, subscription charges or pay-per-view fees (<http://bmjopen.bmj.com>).

If you have any questions on BMJ Open's open peer review process please email [info.bmjopen@bmj.com](mailto:info.bmjopen@bmj.com)

# BMJ Open

## Missed Opportunities for Vaccination in Médecins Sans Frontières supported health facilities: eldest children urge for a second chance.

|                               |                                                                                                                                                                                                                                                                                                                                                                                                                         |
|-------------------------------|-------------------------------------------------------------------------------------------------------------------------------------------------------------------------------------------------------------------------------------------------------------------------------------------------------------------------------------------------------------------------------------------------------------------------|
| Journal:                      | <i>BMJ Open</i>                                                                                                                                                                                                                                                                                                                                                                                                         |
| Manuscript ID                 | bmjopen-2021-059900                                                                                                                                                                                                                                                                                                                                                                                                     |
| Article Type:                 | Original research                                                                                                                                                                                                                                                                                                                                                                                                       |
| Date Submitted by the Author: | 06-Dec-2021                                                                                                                                                                                                                                                                                                                                                                                                             |
| Complete List of Authors:     | Borras-Bermejo, Blanca; Hospital Universitari Vall d'Hebron, Preventive Medicine and Epidemiology Department<br>Panunzi, Isabella; Doctors without Borders, Medical Department, Operational Centre Brussels<br>Bachy, Catherine; Doctors without Borders, Medical Department, Operational Centre Brussels<br>Cuesta, J. Gil; Doctors without Borders, Luxembourg Operational Research Unit, Operational Centre Brussels |
| Keywords:                     | Public health < INFECTIOUS DISEASES, Epidemiology < INFECTIOUS DISEASES, Organisation of health services < HEALTH SERVICES ADMINISTRATION & MANAGEMENT, Paediatric infectious disease & immunisation < PAEDIATRICS, Community child health < PAEDIATRICS                                                                                                                                                                |
|                               |                                                                                                                                                                                                                                                                                                                                                                                                                         |

SCHOLARONE™  
Manuscripts

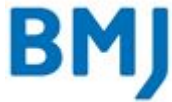

I, the Submitting Author has the right to grant and does grant on behalf of all authors of the Work (as defined in the below author licence), an exclusive licence and/or a non-exclusive licence for contributions from authors who are: i) UK Crown employees; ii) where BMJ has agreed a CC-BY licence shall apply, and/or iii) in accordance with the terms applicable for US Federal Government officers or employees acting as part of their official duties; on a worldwide, perpetual, irrevocable, royalty-free basis to BMJ Publishing Group Ltd ("BMJ") its licensees and where the relevant Journal is co-owned by BMJ to the co-owners of the Journal, to publish the Work in this journal and any other BMJ products and to exploit all rights, as set out in our [licence](#).

The Submitting Author accepts and understands that any supply made under these terms is made by BMJ to the Submitting Author unless you are acting as an employee on behalf of your employer or a postgraduate student of an affiliated institution which is paying any applicable article publishing charge ("APC") for Open Access articles. Where the Submitting Author wishes to make the Work available on an Open Access basis (and intends to pay the relevant APC), the terms of reuse of such Open Access shall be governed by a Creative Commons licence – details of these licences and which [Creative Commons](#) licence will apply to this Work are set out in our licence referred to above.

Other than as permitted in any relevant BMJ Author's Self Archiving Policies, I confirm this Work has not been accepted for publication elsewhere, is not being considered for publication elsewhere and does not duplicate material already published. I confirm all authors consent to publication of this Work and authorise the granting of this licence.

## Title Page

**Title: Missed Opportunities for Vaccination in Médecins Sans Frontières supported health facilities: eldest children urge for a second chance.**

**Running Title:** MOV in MSF supported health facilities

**Key words:** MOV, vaccination, children, immunization program, survey, low-income countries, Expanded Program of Immunization, missed opportunities

## Authors

Blanca Borrás-Bermejo<sup>1</sup>, Isabella Panunzi<sup>2\*</sup>, Catherine Bachy<sup>2\*</sup>, Julita Gil-Cuesta<sup>2,3</sup>

## Affiliations

<sup>1</sup> Preventive Medicine and Epidemiology Department, Hospital Universitari Vall d'Hebron, Barcelona, Spain

<sup>2</sup> Medical Department, Operational Centre Brussels, Médecins Sans Frontières, Brussels, Belgium

<sup>3</sup> Luxembourg Operational Research Unit, Operational Centre Brussels, Médecins Sans Frontières, Brussels, Belgium

\* These authors contributed equally

## Corresponding author:

Blanca Borrás-Bermejo, MD, MPH

Preventive Medicine and Epidemiology Department, Hospital Universitari Vall d'Hebron.

Passeig Vall d'Hebron 119-129, 08035 Barcelona, Spain. [bborras@vhebron.net](mailto:bborras@vhebron.net)

1  
2  
3 **Title: Missed Opportunities for Vaccination in Médecins Sans Frontières supported**  
4  
5 **health facilities: eldest children urge for a second chance.**  
6  
7

8 **Abstract**  
9

10 **Objective**  
11

12  
13 To describe Missed Opportunities for Vaccination (MOV) among children visiting MSF-  
14 supported facilities and its related factors, and to identify reasons for non-vaccination.  
15  
16

17 **Methods**  
18

19  
20 We conducted a cross-sectional survey in 19 MSF-supported facilities between 2011 and 2015  
21 in Mauritania, Niger, South Sudan, Democratic Republic of Congo, Pakistan, and Afghanistan,  
22 including children 0-59 months of age whose caregivers presented their vaccination card at  
23 consultation exit. We describe MOV prevalence and assess the association of MOV with age,  
24 type of facility and reason for visit.  
25  
26  
27  
28

29 **Findings**  
30

31  
32 Among 5055 children's caregivers interviewed, 2738 presented a vaccination card. Of them,  
33 62.8% were eligible for vaccination and of those, 64.6% had a MOV. Presence of MOV was  
34 more likely in children visiting a hospital or visiting a health facility for a reason other than  
35 vaccination. MOV occurrence was significantly higher among children aged 12-23 months  
36 (84.4%) and 24-59 months (88.3%) compared with children below 12 months (56.2%),  
37  $p \leq 0.001$ . Main reasons reported by caregivers for MOV were lack of vaccines (40.3%), reason  
38 unknown (31.2%), and not being informed (17.6%).  
39  
40  
41  
42  
43

44 **Conclusion**  
45

46  
47 MOV remains an important problem in low resource settings. Children beyond the Expanded  
48 Program of Immunization target are particularly vulnerable for MOV; therefore, assessments  
49 should include children above 23 months of age to better estimate MOV. We strongly  
50 recommend assessment of eligibility for vaccination in all children in health care settings  
51 regardless of the visit reason and strengthening implementation of "Second year of life" visits  
52 to reduce MOV.  
53  
54  
55  
56  
57  
58  
59  
60

### Strengths and limitations of this study

- The major strength of the study is that only children with a valid vaccination card were included, so not relying on self-reported data helped to avoid potential recall bias
- Differences by gender on Missed Opportunities for Vaccination were not explored
- Reasons related with Missed Opportunities for Vaccination were limited to those included at the questionnaire and declared by caregivers.

For peer review only

## 1 **Introduction**

2 Since 1983, the Global Advisory Group of the Expanded Program of Immunization (EPI) has  
3 recommended using every opportunity to immunize each eligible child, regardless of the reason  
4 for consultation. If that occasion does not result in receiving all the vaccines for which the child  
5 is eligible, it is defined as a Missed Opportunity for Vaccination (MOV). Among the causes for  
6 under-vaccination in low and middle-income countries, 44% are for reasons related to health  
7 systems, including MOV and lack of access to health care (1). In 1993, the first systematic  
8 review, including 45 countries, found a median MOV prevalence of 67% (2). Since then, the  
9 World Health Organization (WHO) has promoted the use of MOV surveys to measure the  
10 performance of health services in vaccination (3),(4). In order to improve immunization  
11 coverage, in 2017 WHO recommended a revised methodology to assess MOV, targeting  
12 children aged 0-23 months (5). However, data is scarce on MOV prevalence in children above  
13 23 months of age (6). Through its medical humanitarian programs in low and middle-income  
14 countries, Médecins Sans Frontières (MSF) strengthens routine vaccination services regardless  
15 the age of the child following WHO recommendations in order to reduce the number of under  
16 and unvaccinated children. Therefore, we took the opportunity to systematically assess MOV  
17 in children up to five years of age within MSF programs.

18 Our objective was to describe the MOV prevalence and characteristics, and to identify reasons  
19 for non-vaccination among children up to five years of age visiting MSF-supported health  
20 facilities in six different countries.

## 21 **Methods**

### 22 **Study design and settings**

1  
2  
3 23 A cross-sectional exit survey of caregivers was performed in 19 health facilities (four hospitals  
4  
5 24 and 15 primary health care centers [PHCC]) between 2011 and 2015 in six countries:  
6  
7 25 Mauritania, Niger, South Sudan, Democratic Republic of Congo, Pakistan and Afghanistan.  
8  
9

## 10 26 **Patient and Public Involvement**

11  
12  
13 27 Patients or the public were not involved in the design, or conduct, or reporting, or dissemination  
14  
15  
16 28 plans of our research.  
17

## 18 29 **Study population and participant selection**

19  
20  
21  
22 30 The study population consisted of children up to five years of age accompanied by a caregiver,  
23  
24 31 visiting an MSF-supported facility. Health facilities and time to perform the assessment were  
25  
26 32 selected on a convenience basis during the study period. A convenient sample of all caregivers  
27  
28 33 accompanying a child under five years of age on the specific day of the survey in each facility  
29  
30 34 were approached. Caregivers were invited to participate at the facility exit, regardless of the  
31  
32 35 reason for the visit, and those who provided oral consent were interviewed. If several children  
33  
34 36 were present per caregiver, the interviewer included them all. Children whose caregivers did  
35  
36 37 not present the respective vaccination card were excluded from the analysis.  
37  
38  
39

## 40 38 **Data collection**

41  
42  
43  
44 39 MSF developed a standardized methodology to assess MOV based on the 1988 WHO tool.  
45  
46 40 Interviews were conducted in local languages. In preparation for the survey, local staff received  
47  
48 41 a two-day training focusing on conducting the interview and identification of eligible children  
49  
50 42 for vaccination according to national vaccination schedules.  
51

52  
53  
54 43 A structured questionnaire was used (Supplementary material). Information on type of facility  
55  
56 44 (hospital or primary health care center [PHCC]), age of the child, presentation of vaccination  
57  
58 45 card, reason for visiting the facility and vaccination history were collected. Surveyors  
59  
60



1  
2  
3 46 determined if the child was eligible that day for at least one vaccine dose according to age and  
4  
5 47 the national vaccination schedule, whether he/she had received all the recommended vaccines  
6  
7 48 during the visit, and the presence of a contraindication for vaccination (defined as fever above  
8  
9 49 38,5 °C). For those who had not received each of the recommended vaccines during the visit,  
10  
11 50 surveyors asked for reasons why the child was not vaccinated, caregivers' acceptance of  
12  
13 51 receiving the missing vaccines doses, and their awareness of next vaccination appointment.  
14  
15

## 16 17 52 **Data analysis**

18  
19  
20 53 We classified children as having a MOV as per standard WHO's definition (5) according to  
21  
22 54 each national vaccination schedule. A MOV occurs when a child eligible for vaccination  
23  
24 55 (without contraindication) remains unvaccinated or partially vaccinated (not up to date) at the  
25  
26 56 end of any visit to a health facility (Figure 1).  
27  
28  
29

30 57 We calculated the prevalence of MOV as the number of children with MOV divided by the  
31  
32 58 number of children eligible for a vaccination - which excluded those already up to date at the  
33  
34 59 start of the visit and those with a reported contraindication. Among children with MOV we  
35  
36 60 calculated 1. vaccination acceptance (as the proportion of caregivers who would have accepted  
37  
38 61 vaccination if it had been proposed on the day of the visit) and 2. vaccination appointments  
39  
40 62 given (as the proportion of caregivers who knew their date of next vaccination appointment).  
41  
42  
43  
44

45 63 Proportions were used to describe the children and to estimate MOV. Significant differences in  
46  
47 64 the distribution were assessed using the Pearson's two-sided Chi-square test or Fisher exact  
48  
49 65 test. For the bivariate analysis, age was categorized in targeted by the EPI (below 12 months of  
50  
51 66 age) or not targeted ( $\geq 12$  months). Reason for visit to the facility was grouped into either  
52  
53 67 vaccination or other reasons. We assessed the association of MOV with age, type of facility and  
54  
55 68 reason for visit by calculating Odds Ratios. A logistic regression model was adjusted for age  
56  
57  
58  
59  
60

69 (0-11,12-59 months), type of facility (hospital, PHCC), and reason for visit (vaccination, other  
70 reason). The level of statistical significance was set at  $p < 0.05$ .

71 In each facility, data entry officers inputted the paper questionnaire data into an Excel database,  
72 which was validated by two of the study investigators. The analysis was performed using  
73 STATA (version 16, College Station, Texas).

#### 74 **Ethic statement**

75 Prior to each evaluation authorization from the local health authorities and from the director of  
76 each health facility was obtained. Oral consent was obtained from each caregiver. During the  
77 survey, children identified with MOV were sent back to the vaccination unit to receive the  
78 missing vaccine(s) if the caregiver agreed and if there was no shortage. All data from the  
79 questionnaires were anonymous and entered into a dedicated password-protected electronic  
80 database. This research fulfilled the exemption criteria set by the Médecins Sans Frontières  
81 Ethics Review Board.

#### 82 **Results**

83 From 2011 to 2015, the caregivers of 5055 children were interviewed in 19 facilities (four  
84 hospitals and 15 PHCC). We report the results for the 2706 (53.5%) children who presented  
85 their vaccination card on the day of the survey: 1888 from Niger, 447 from South Sudan, 244  
86 from Mauritania, 79 from Democratic Republic of Congo, 33 from Afghanistan and 15 from  
87 Pakistan.

#### 88 **Characteristics of the study population**

89 Among the 2706 children included, 995 (36.7%) were already up to date before the visit, and  
90 1711 (63.2%) were eligible for vaccination. Twenty three caregivers (1.3%) reported a  
91 contraindication (Figure 1). Among eligible children, 609 (36.1%) were vaccinated during the  
92 visit, whereas 1079 (63.9%) had a MOV at exit from the health facility.

1  
2  
3 93 Children's baseline characteristics are presented in Table 1. Their mean age was 10.1 months  
4  
5 94 (Standard Deviation - 9). The majority (2213, 81.8%) were interviewed at exit of a PHCC. The  
6  
7  
8 95 most common reason for visiting the health facility was curative consultation (831, 30.7%).  
9

### 10 96 **Characteristics of children with MOV**

11  
12  
13 97 Most of the children who were eligible for vaccination and consulting for a reason other than  
14  
15 98 vaccination, had a MOV (960, 71.9%), while a third of the children coming to the facility for  
16  
17 99 vaccination also had a MOV (119, 33.7%). More than 80% children aged 12-23 months and  
18  
19  
20 100 almost 90% of children aged 23-59 had a MOV, compared to 55% of children below 12 months.  
21  
22  
23 101 MOV occurrence was significantly more likely among older children than younger ones (Table  
24  
25 102 1).  
26  
27

28 103 Only four caregivers of children with MOV would have refused vaccination if it had been  
29  
30 104 proposed during the visit. About one fifth (21%) of caregivers of children with MOV were  
31  
32  
33 105 aware of the date of the next vaccination appointment.  
34  
35

36 106 The most common reason declared for having a MOV was lack of vaccines (40.1%), followed  
37  
38 107 by reason unknown (32%), not being informed (17.3%), lack of staff (3.3%), waiting time too  
39  
40  
41 108 long (1.7%) and other unclassified reasons (5.6%).  
42  
43

### 44 109 **Factors related with presence of MOV**

45  
46 110 Children above 12 months of age (not targeted by the EPI) and those accessing the health  
47  
48 111 facility for a reason other than vaccination, had an almost five times higher risk of having a  
49  
50 112 MOV (Table 2), compared to children below 12 months of age and those visiting for  
51  
52  
53 113 vaccination. Those children visiting a hospital had 2.7 times higher risk for having a MOV than  
54  
55 114 children visiting a PHCC. After adjusting by type of facility and reason for visit, children above  
56  
57  
58 115 12 months still had a significantly higher risk of having a MOV (adjusted OR: 1.7, 95%CI 1.1-  
59  
60 116 2.5).

117 **Table 1. Characteristics of children who visited MSF-supported health facilities and the**  
 118 **presence of Missed Opportunities for Vaccination (MOV), 2011-2015**

|                           | Total children<br>n=2706<br>n (%) | Eligible for<br>vaccination <sup>a</sup><br>n=1688<br>n (%) <sup>b</sup> | MOV                      |                           | <i>p</i> value      |
|---------------------------|-----------------------------------|--------------------------------------------------------------------------|--------------------------|---------------------------|---------------------|
|                           |                                   |                                                                          | No<br>n (%) <sup>c</sup> | Yes<br>n (%) <sup>c</sup> |                     |
| Age groups                |                                   |                                                                          |                          |                           |                     |
| <12 m                     | 1805 (66.7)                       | 1203 (66.5)                                                              | 540 (44.9)               | 663 (55.1)                | <0,001 <sup>e</sup> |
| 12-23 m                   | 597 (22.1)                        | 314 (52.6)                                                               | 49 (15.6)                | 265 (84.4)                |                     |
| 24-59 m                   | 304 (11.2)                        | 171 (56.3)                                                               | 20 (11.7)                | 151 (88.3)                |                     |
| Facility type             |                                   |                                                                          |                          |                           |                     |
| Hospital                  | 493 (18.2)                        | 336 (68.2)                                                               | 67 (20)                  | 269 (80.1)                | <0,001 <sup>e</sup> |
| PHCC <sup>d</sup>         | 2213 (81.8)                       | 1352 (61.1)                                                              | 542 (40.1)               | 810 (59.9)                |                     |
| Reason of the visit       |                                   |                                                                          |                          |                           |                     |
| Curative                  | 831 (30.7)                        | 513 (61.7)                                                               | 40 (7.8)                 | 473 (92.2)                | <0,001 <sup>f</sup> |
| Other                     | 706 (26.1)                        | 311 (44.1)                                                               | 281 (90.4)               | 30 (9.7)                  |                     |
| Vaccination               | 436 (16.1)                        | 353 (81.0)                                                               | 234 (64.3)               | 119 (33.7)                |                     |
| Nutrition                 | 430 (15.9)                        | 275 (64.0)                                                               | 23 (8.4)                 | 252 (91.6)                |                     |
| Mother Child Health visit | 265 (9.8)                         | 214 (80.8)                                                               | 29 (13.6)                | 185 (86.5)                |                     |
| Accompanying              | 38 (1.4)                          | 22 (57.9)                                                                | 2 (9.0)                  | 20 (90.9)                 |                     |

119 <sup>a</sup> Without contraindication for vaccination

120 <sup>b</sup> Row percentage over the total children

121 <sup>c</sup> Row percentage over the eligible children without contraindication for vaccination

122 <sup>d</sup> PHCC: Primary Health Care Center

123 <sup>e</sup> Chi square test

124 <sup>f</sup> Fisher exact test

126 **Table 2. Factors related to Missed Opportunities for Vaccination (MOV) in eligible**  
 127 **children who visited MSF-supported health facilities, 2011-2015**

|                     | MOV<br>children<br>n= 1079<br>n (%) | Odds Ratio<br>(95%CI) | Adjusted Odds<br>Ratio<br>(95%CI) |
|---------------------|-------------------------------------|-----------------------|-----------------------------------|
| Age in months       |                                     |                       |                                   |
| 0-11 m              | 663 (55.1)                          |                       |                                   |
| 12-59 m             | 416 (85.8)                          | 4.91 (3.67-6.57)      | 3.79 (2.84-5.07)                  |
| Reason for visiting |                                     |                       |                                   |
| Vaccination         | 119 (33.7)                          |                       |                                   |
| Other               | 960 (89.0)                          | 5.03 (3.86-6.56)      | 3.52 (2.70-4.58)                  |
| Facility type       |                                     |                       |                                   |
| PHCC <sup>a</sup>   | 810 (59.9)                          |                       |                                   |
| Hospital            | 269 (80.1)                          | 2.69 (2.00-3.60)      | 2.75 (2.02-3.73)                  |

128 <sup>a</sup> PHCC: Primary Health Care Center

129 Odds ratio adjusted for age, reason for visiting, facility type (two categories each)

130

## 131 **Discussion**

132 This study summarizes MSF experience and lessons learned assessing MOV from 2011 to 2015  
133 in six low-income countries. To our knowledge, this is one of the few studies that assess MOV  
134 in children beyond the EPI target. Our results highlight that, despite MSF's efforts, most  
135 children had a MOV after visiting one of the facilities. Of those children who specifically visited  
136 for vaccination, one third still missed at least one dose of vaccine for which eligible during the  
137 visit. The proportion of children with MOV increased with age, with children above one year  
138 of age being at higher risk.

139 MOV prevalence in our study (63.9%) was higher than the last systematic review conducted in  
140 low income countries in 2014, which found a prevalence of 32% (26.8–37.7) (6). An  
141 explanation could be that the majority of studies in this meta-analysis only included children  
142 below two years of age resulting in a lower estimation of MOV. As our data show, MOV was  
143 nearly 90% in children above 23 months of age. One of the few studies including older children  
144 also reported that MOV prevalence was higher in children aged 1-5 years (56.6%), compared  
145 to those below one year (31.4%) (7). Thus, we believe that overall MOV prevalence is being  
146 seriously underestimated, as assessments do not include children beyond the EPI target, that is,  
147 above 23 months of age.

148 Consistent with recent studies in low income countries (8), we found a higher MOV prevalence  
149 in children above 12 months. In a recent study that assessed MOV with WHO methodology in  
150 Chad and Malawi (9), Ogbuano et al. found a MOV prevalence of 86% in Chad and 94% in  
151 Malawi among children above one year of age, compared to 49% and 61% below one year  
152 respectively.

153 Age as a risk for having MOV may be explained by older children having been perceived as  
154 “too old” to be eligible (10), as most of EPI programs only target children below one year of

1  
2  
3 155 age. In a WHO review about factors related with under-vaccination (11), false contraindications  
4  
5 156 like age were found to be one of the main reasons for having a MOV. This was reflected in our  
6  
7  
8 157 study, where only 4% (n=14) of children visiting specifically for vaccination were above 12  
9  
10 158 months of age. A “second year of life healthy child visit” is already recommended by WHO  
11  
12 159 (12) increasing the number of opportunities for vaccination in children above 12 months of age,  
13  
14 160 especially in those who might have missed vaccination in their first year of life. This strategy,  
15  
16  
17 161 together with complementary catch-up activities to continue screening children at any contact  
18  
19 162 with health services should be strengthened in low-resource settings (13)(14)(15). The latest  
20  
21 163 WHO update of recommendations for routine immunization (16) emphasizes that measles  
22  
23 164 vaccine should not be limited only to children up to 12 months of age. We believe this approach  
24  
25  
26 165 must be extended to all vaccines included in the vaccination schedule, in order to increase  
27  
28 166 individual protection and improve population vaccine coverage.

30  
31 167 Our data draw attention to the high proportion of children missing the opportunity to get  
32  
33 168 vaccinated at hospital level. A similar proportion has been found in a recent study performed  
34  
35  
36 169 in northern Indian hospitals (17). This could be explained by the belief of false contraindications  
37  
38 170 for vaccination in a sick child, both among caregivers and health care workers. For example, a  
39  
40 171 study in Haiti reported that up to 13% of reasons for under vaccination was child illness, despite  
41  
42 172 the fact that mild infections should not prevent vaccination (18). In the last MOV assessments  
43  
44 173 using WHO methodology, Anyie J. Li et al. (10) found that only 24% of health care workers  
45  
46 174 were able to identify true contraindications, and L. Kaboré et al. (8) reported that 83% of health  
47  
48 175 workers failed to correctly identify valid contraindications for vaccination. Promoting training  
49  
50 176 on true contraindications for vaccination among health care workers could be an effective  
51  
52 177 strategy to reduce MOV (19).

53  
54  
55  
56  
57 178 We identified that one third of children actually visiting for vaccination were still not up to date  
58  
59 179 at the end of the visit despite being vaccinated with one or more doses. Similar estimates were

1  
2  
3 180 found in four recent MOV assessments in East Timor, Chad, Malawi, and Burkina Faso  
4  
5 181 (8)(9)(10). This could be explained by supply shortages of specific vaccines, but also by health  
6  
7 182 workers potentially failing to identify eligibility for certain vaccines. Failure to administer  
8  
9 183 simultaneous vaccines due to fear of wasting doses from multi-vial vaccines has been also  
10  
11 184 suggested as an explanation for remaining MOV after vaccination visits (20)(21).  
12  
13  
14

15 185 Over three-quarters of eligible children consulting for reasons other than vaccination (mother-  
16  
17 186 and-child health visits, nutrition, curative) had a MOV. Integrating vaccination into other  
18  
19 187 preventive services could represent a significant reduction on MOV (22). Also, strengthening  
20  
21 188 routine screening of vaccination status irrespectively of reason visit, could be an opportunity to  
22  
23 189 improve vaccine uptake (23).  
24  
25  
26

27 190 Our survey allowed us to identify and address the two main reasons related to MOV. More than  
28  
29 191 a third of caregivers reported lack of vaccines as the reason for MOV, and almost 20% reported  
30  
31 192 not been informed about the eligibility of the child. This is consistent with recent MOV  
32  
33 193 assessments (9), where approximately 30% of health care workers reported insufficient vaccine  
34  
35 194 supply or logistics issues. Inadequate vaccine supply has already been pointed out as one of the  
36  
37 195 main reasons for under vaccination in low income countries (1). Ministries of Health and their  
38  
39 196 partners must work to ensure adequate vaccine supply at facility level in order be able to  
40  
41 197 vaccinate any children who had already accessed health care services (24). Lack of information  
42  
43 198 on vaccine eligibility has also been reported elsewhere (25); therefore, promotion strategies  
44  
45 199 should address the lack of information causing MOV.  
46  
47  
48  
49

50  
51 200 This study has three main limitations. First, gender was not collected, missing the opportunity  
52  
53 201 to uncover gender differences. Nevertheless, no gender differences in the distribution of MOV  
54  
55 202 have been reported in the latest studies (6)(9). Second, our survey didn't allow us to explore  
56  
57 203 health care providers' practices and perceptions, identified as one of the main reasons related  
58  
59  
60

1  
2  
3 204 with MOV in the last systematic review (6). In 2015, WHO launched a revised MOV strategy  
4  
5 205 which included Knowledge, Attitudes and Practices (KAP) questionnaires, to better guide the  
6  
7 206 implementation of interventions to reduce MOV (9), which is generating new evidence (26).  
8  
9  
10 207 Third, we excluded from the analysis almost half of the children, as they were not able to present  
11  
12 208 a vaccination card. This may mean that we underestimated MOV prevalence in our target  
13  
14 209 population, since not presenting a vaccination card has been associated with MOV (1)(6)(27).  
15  
16  
17 210 However, not relying on self-reported data helped avoid potential recall bias, which is a  
18  
19 211 limitation in vaccine coverage studies in low resource settings(28).  
20  
21

## 22 **Conclusions**

23  
24 213 Despite progress in vaccine coverage through the Global Vaccine Action Plan, MOV remain  
25  
26 214 an important problem in low-resource settings. Avoiding MOV should remain a priority where  
27  
28 215 access to health care is limited, especially considering also the negative impact COVID-19  
29  
30 216 pandemic is having on routine immunization programs, especially in low and middle income  
31  
32 217 countries (29).  
33  
34  
35

36 218 We recommend integrating routine vaccination screening in health care settings regardless of  
37  
38 219 visit reason as a main strategy to identify eligible children and reduce MOV, together with  
39  
40 220 addressing caregiver's lack of information and knowledge gaps in health care workers.  
41  
42  
43

44 221 We identified that children above 23 months of age as particularly vulnerable for MOV. At the  
45  
46 222 moment of our report, WHO methodology for MOV assessments only targets children below  
47  
48 223 23 months, which according to our findings leads to underestimation of MOV. Therefore, we  
49  
50 224 recommend that MOV assessments should include children up to 5 years of age. Strengthening  
51  
52 225 the implementation of second year of life visits, as recommend by WHO, and catch-up  
53  
54 226 vaccination activities would provide missed vaccine doses to those who urge for a second  
55  
56 227 chance.  
57  
58  
59  
60



## 228 **Acknowledgements**

229 We would like to thank all caregivers for sharing their invaluable time, and all health care  
230 workers who performed the surveys. Special thanks to Ibrahim Barrie and Marie-Eve Burny for  
231 implementation of MOV studies in the field. Thanks to Tony Reid for language review and to  
232 J.A. Rodrigo for its valuable inputs.

## 233 **Contributorship Statement**

234 Bachy C. and Panunzi I. designed the study and contributed to the development on the field.  
235 Bachy C., Panunzi I., Gil-Cuesta J. and Borrás-Bermejo B. carried out the data analysis. Borrás-  
236 Bermejo B. drafted the manuscript that was critically reviewed and approved by all authors.

## 237 **Competing interests**

238 None declared

## 239 **Funding**

240 The study was carried out by MSF staff as part of their routine activities. No extra funding was  
241 required.

## 242 **Data Availability Statement**

243 Questionnaire dataset is available in a public, open access repository.

244 [dataset] (30) Borrás-Bermejo B. Data from: Missed Opportunities for Vaccination in MSF-  
245 Supported Health Facilities. Open Science Framework. December 6, 2021.

246 <https://doi.org/10.17605/OSF.IO/SFXDK>

## 248 **References**

- 249 1. Rainey JJ, Watkins M, Ryman TK, Sandhu P, Bo A, Banerjee K. Reasons related to  
250 non-vaccination and under-vaccination of children in low and middle income countries:  
251 Findings from a systematic review of the published literature, 1999-2009. Vol. 29,  
252 Vaccine. 2011. p. 8215–21.

- 1  
2  
3 253 2. Hutchins SS, Jansen HAFM, Robertson SE, Evans P, Kin-Farley RJ. Studies of missed  
4  
5 254 opportunities for immunization in developing and industrialized countries. Bull World  
6  
7 255 Health Organ [Internet]. 1993 [cited 2019 Oct 25];71(5):549–60. Available from:  
8  
9 256 <https://www.ncbi.nlm.nih.gov/pmc/articles/PMC2393481/>  
10  
11  
12  
13 257 3. Methodology for the Evaluation of Missed Opportunities for Vaccination [Internet].  
14  
15 258 Pan American Health Organization. 2014. Available from:  
16  
17 259 [https://www.paho.org/hq/dmdocuments/2015/MissedOpportunity-Vaccination-](https://www.paho.org/hq/dmdocuments/2015/MissedOpportunity-Vaccination-Protocol-2014.pdf)  
18  
19 260 [Protocol-2014.pdf](https://www.paho.org/hq/dmdocuments/2015/MissedOpportunity-Vaccination-Protocol-2014.pdf)  
20  
21  
22  
23 261 4. Velandia-González M, Trumbo SP, Díaz-Ortega JL, Bravo-Alcántara P, Danovaro-  
24  
25 262 Holliday MC, Dietz V, et al. Lessons learned from the development of a new  
26  
27 263 methodology to assess missed opportunities for vaccination in Latin America and the  
28  
29 264 Caribbean. 2011 Feb 21 [cited 2019 Oct 25];15(1):5. Available from:  
30  
31 265 <http://www.ncbi.nlm.nih.gov/pubmed/25889653>  
32  
33  
34  
35 266 5. Methodology for the Assessment of Missed Opportunities for Vaccination [Internet].  
36  
37 267 Geneva: World Health Organization. 2017 [cited 2021 Feb 22]. Available from:  
38  
39 268 <https://apps.who.int/iris/handle/10665/259201>  
40  
41  
42  
43 269 6. Sridhar S, Maleq N, Guillermet E, Colombini A, Gessner BD. A systematic literature  
44  
45 270 review of missed opportunities for immunization in low- and middle-income countries.  
46  
47 271 Vaccine [Internet]. 2014 Dec 5 [cited 2019 Oct 11];32(51):6870–9. Available from:  
48  
49 272 <http://www.ncbi.nlm.nih.gov/pubmed/25444813>  
50  
51  
52  
53 273 7. Garib Z, Vargas AL, Trumbo SP, Anthony K, Diaz-Ortega JL, Bravo-Alcántara P, et  
54  
55 274 al. Missed Opportunities for Vaccination in the Dominican Republic: Results of an  
56  
57 275 Operational Investigation. Biomed Res Int [Internet]. 2016 [cited 2019 Sep  
58  
59 276 17];2016:4721836. Available from: <http://www.ncbi.nlm.nih.gov/pubmed/27819003>  
60

- 1  
2  
3 277 8. Kaboré L, Meda B, Médah I, Shendale S, Nic Lochlainn L, Sanderson C, et al.  
4  
5 278 Assessment of missed opportunities for vaccination (MOV) in Burkina Faso using the  
6  
7 279 World Health Organization's revised MOV strategy: Findings and strategic  
8  
9 considerations to improve routine childhood immunization coverage. *Vaccine*  
10 280  
11 [Internet]. 2020 Nov 10 [cited 2021 Feb 22];38(48):7603–11. Available from:  
12 281  
13 /pmc/articles/PMC7604568/  
14 282
- 15  
16  
17 283 9. Ogbuanu IU, Li AJ, Anya BM, Tamadji M, Chirwa G, Chiwaya KW, et al. Can  
18  
19 vaccination coverage be improved by reducing missed opportunities for vaccination?  
20 284  
21 Findings from assessments in Chad and Malawi using the new WHO methodology.  
22 285  
23 Uthman O, editor. *PLoS One* [Internet]. 2019 Jan 24 [cited 2019 Nov  
24 286  
25 7];14(1):e0210648. Available from: <http://dx.plos.org/10.1371/journal.pone.0210648>  
26 287  
27  
28  
29 288 10. Li AJ, Peiris TSR, Sanderson C, Lochlainn LN, Mausiry M, da Silva RBJBM, et al.  
30  
31 Opportunities to improve vaccination coverage in a country with a fledgling health  
32 289  
33 system: Findings from an assessment of missed opportunities for vaccination among  
34 290  
35 health center attendees—Timor Leste, 2016. *Vaccine*. 2019 Jul 18;37(31):4281–90.  
36 291  
37  
38  
39 292 11. Epidemiology of the Unimmunized Child. Findings from the Grey Literature. Prepared  
40  
41 for the World Health Organization. October 2009. IMMUNIZATION basics Project.  
42 293  
43 Geneva World Heal Organ [Internet]. 2009 [cited 2021 Feb 22]; Available from:  
44 294  
45 [https://www.who.int/immunization/sage/ImmBasics\\_Epid\\_unimm\\_Final\\_v2.pdf](https://www.who.int/immunization/sage/ImmBasics_Epid_unimm_Final_v2.pdf)  
46 295  
47  
48  
49 296 12. Establishing and strengthening immunization in the second year of life : Practices for  
50  
51 vaccination beyond infancy [Internet]. Geneva: World Health Organization. 2018 [cited  
52 297  
53 2021 Oct 28]. Available from:  
54 298  
55 <https://apps.who.int/iris/bitstream/handle/10665/260556/9789241513678-eng.pdf>  
56 299  
57  
58  
59 300 13. Standards for improving the quality of care for children and young adolescents in  
60

- 1  
2  
3 301 health facilities [Internet]. Geneva: World Health Organization. 2018 [cited 2021 Oct  
4  
5 302 28]. p. 118. Available from: <https://www.who.int/publications/i/item/9789241565554>  
6  
7  
8 303 14. Integrated management of childhood illness: caring for newborns and children in the  
9  
10 304 community. [Internet]. Geneva: World Health Organization. 2011 [cited 2021 Sep 18].  
11  
12 Available from: <https://apps.who.int/iris/handle/10665/44398>  
13 305  
14  
15 306 15. Hanson CM, Mirza I, Kumapley R, Ogbuanu I, Kezaala R, Nandy R. Enhancing  
16  
17 307 immunization during second year of life by reducing missed opportunities for  
18  
19 308 vaccinations in 46 countries. *Vaccine* [Internet]. 2018 May 31 [cited 2021 Oct  
20  
21 309 28];36(23):3260–8. Available from: [https://linkinghub.elsevier.com/retrieve/pii/S0264-  
22  
23 310 410X\(18\)30577-2](https://linkinghub.elsevier.com/retrieve/pii/S0264-410X(18)30577-2)  
24  
25  
26  
27 311 16. Table 2: Summary of WHO Position Papers - Recommended Routine Immunizations  
28  
29 312 for Children [Internet]. Geneva: World Health Organization. 2020 [cited 2021 Sep 18].  
30  
31 Available from:  
32 313  
33  
34 314 [https://www.who.int/immunization/policy/Immunization\\_routine\\_table2.pdf](https://www.who.int/immunization/policy/Immunization_routine_table2.pdf)  
35  
36  
37 315 17. Albaugh N, Mathew J, Choudhary R, Sitaraman S, Tomar A, Bajwa IK, et al.  
38  
39 316 Determining the burden of missed opportunities for vaccination among children  
40  
41 317 admitted in healthcare facilities in India: a cross-sectional study. *BMJ Open* [Internet].  
42  
43 318 2021 Mar 1 [cited 2021 Aug 24];11(3):e046464. Available from:  
44  
45 319 <https://bmjopen.bmj.com/content/11/3/e046464>  
46  
47  
48  
49 320 18. Rainey JJ, Lacapère F, Danovaro-Holliday MC, Mung K, Magloire R, Kananda G, et  
50  
51 321 al. Vaccination Coverage in Haiti: Results from the 2009 National Survey. *Vaccine*  
52  
53 322 [Internet]. 2012;30(9):1746–51. Available from:  
54  
55 323 <https://www.sciencedirect.com/science/article/pii/S0264410X11019384?via%3Dihub>  
56  
57  
58  
59 324 19. Jaca A, Mathebula L, Iweze A, Pienaar E, Wiysonge CS. A systematic review of

- 1  
2  
3 325 strategies for reducing missed opportunities for vaccination. *Vaccine* [Internet]. 2018  
4  
5 326 [cited 2021 Oct 28];36(21):2921–7. Available from:  
6  
7 327 <http://www.ncbi.nlm.nih.gov/pubmed/29680199>  
8  
9  
10 328 20. Wallace AS, Willis F, Nwaze E, Dieng B, Sipilanyambe N, Daniels D, et al. Vaccine  
11  
12 329 wastage in Nigeria: An assessment of wastage rates and related vaccinator knowledge,  
13  
14 330 attitudes and practices. *Vaccine* [Internet]. 2017 Dec 4 [cited 2021 Feb  
15  
16 331 22];35(48):6751–8. Available from: [/pmc/articles/PMC5771486/](https://pubmed.ncbi.nlm.nih.gov/35771486/)  
17  
18  
19 332 21. Wallace AS, Krey K, Hustedt J, Burnett E, Choun N, Daniels D, et al. Assessment of  
20  
21 333 vaccine wastage rates, missed opportunities, and related knowledge, attitudes and  
22  
23 334 practices during introduction of a second dose of measles-containing vaccine into  
24  
25 335 Cambodia’s national immunization program. *Vaccine* [Internet]. 2018 Jul 16 [cited  
26  
27 336 2021 Feb 22];36(30):4517–24. Available from: [/pmc/articles/PMC6032508/](https://pubmed.ncbi.nlm.nih.gov/36032508/)  
28  
29  
30 337 22. Restrepo-Méndez MC, Barros AJD, Wong KLM, Johnson HL, Pariyo G, Wehrmeister  
31  
32 338 FC, et al. Missed opportunities in full immunization coverage: Findings from low- and  
33  
34 339 lower-middle-income countries. *Glob Health Action* [Internet]. 2016 Dec 1 [cited 2021  
35  
36 340 Oct 28];9(1):30963. Available from:  
37  
38 341 <https://www.tandfonline.com/doi/full/10.3402/gha.v9.30963>  
39  
40  
41 342 23. Practical guide for the design, use and promotion of home-based records in  
42  
43 343 immunization programmes [Internet]. Geneva: World Health Organization. 2015 [cited  
44  
45 344 2021 Oct 28]. Available from:  
46  
47 345 [https://apps.who.int/iris/bitstream/handle/10665/175905/WHO\\_IVB\\_15.05\\_eng.pdf?se](https://apps.who.int/iris/bitstream/handle/10665/175905/WHO_IVB_15.05_eng.pdf?sequence=2&isAllowed=y)  
48  
49 346 [quence=2&isAllowed=y](https://apps.who.int/iris/bitstream/handle/10665/175905/WHO_IVB_15.05_eng.pdf?sequence=2&isAllowed=y)  
50  
51  
52 347 24. 2017 Assessment Report of the Global Vaccine Action Plan. Strategic Advisory Group  
53  
54 348 of Experts on Immunization. [Internet]. Geneva: World Health Organization. 2017  
55  
56  
57  
58  
59  
60

- 1  
2  
3 349 [cited 2021 Oct 28]. Available from:  
4  
5 350 [https://www.who.int/immunization/web\\_2017\\_sage\\_gvap\\_assessment\\_report\\_en.pdf?u](https://www.who.int/immunization/web_2017_sage_gvap_assessment_report_en.pdf?ua=1)  
6  
7  
8 351 a=1  
9  
10 352 25. Gil Cuesta J, Whitehouse K, Kaba S, Nanan-N'Zeth K, Haba B, Bachy C, et al. 'When  
11  
12 you welcome well, you vaccinate well': a qualitative study on improving vaccination  
13 353 coverage in urban settings in Conakry, Republic of Guinea. *Int Health* [Internet]. 2020  
14 354 Jan 13 [cited 2021 Aug 24];00:1–8. Available from:  
15 355 [https://academic.oup.com/inthealth/advance-](https://academic.oup.com/inthealth/advance-article/doi/10.1093/inthealth/ihz097/5700807)  
16 356 [article/doi/10.1093/inthealth/ihz097/5700807](https://academic.oup.com/inthealth/advance-article/doi/10.1093/inthealth/ihz097/5700807)  
17 357  
18  
19 358 26. Fatiregun AA, Lochlainn LN, Kaboré L, Dosumu M, Isere E, Olaoye I, et al. Missed  
20 359 opportunities for vaccination among children aged 0–23 months visiting health  
21 360 facilities in a southwest State of Nigeria, December 2019. Pakhare AP, editor. *PLoS*  
22 361 *One* [Internet]. 2021 Aug 27 [cited 2021 Sep 19];16(8):e0252798. Available from:  
23 362 <https://dx.plos.org/10.1371/journal.pone.0252798>  
24 363  
25 364 27. Olorunsaiye CZ, Langhamer MS, Wallace AS, Watkins ML. Missed opportunities and  
26 365 barriers for vaccination: a descriptive analysis of private and public health facilities in  
27 366 four African countries. *Pan Afr Med J* [Internet]. 2017 [cited 2021 Oct 28];27(Suppl  
28 367 3):6. Available from: <https://pubmed.ncbi.nlm.nih.gov/29296141/>  
29 368  
30 369 28. Cuesta JG, Mukembe N, Valentiner-Branth P, Stefanoff P, Lenglet A, Lenglet A.  
31 370 Measles Vaccination Coverage Survey in Moba, Katanga, Democratic Republic of  
32 371 Congo, 2013: Need to Adapt Routine and Mass Vaccination Campaigns to Reach the  
33 372 Unreached. *PLoS Curr* [Internet]. 2015 Feb 2 [cited 2021 Oct  
34 373 28];7(ecurrents.outbreaks.8a1b00760dfd81481eb42234bd18ced3). Available from:  
35 374 [/pmc/articles/PMC4336195/](https://pubmed.ncbi.nlm.nih.gov/29296141/)  
36 375  
37 376  
38 377  
39 378  
40 379  
41 380  
42 381  
43 382  
44 383  
45 384  
46 385  
47 386  
48 387  
49 388  
50 389  
51 390  
52 391  
53 392  
54 393  
55 394  
56 395  
57 396  
58 397  
59 398  
60 399

- 1  
2  
3 373 29. Second round of the national pulse survey on continuity of essential health services  
4  
5 374 during the COVID-19 pandemic [Internet]. Geneva: World Health Organization. 2021  
6  
7 [cited 2021 Oct 28]. Available from: [https://www.who.int/publications/i/item/WHO-](https://www.who.int/publications/i/item/WHO-2019-nCoV-EHS-continuity-survey-2021.1)  
8 375  
9 2019-nCoV-EHS-continuity-survey-2021.1  
10 376  
11  
12  
13 377 30. Borrás-Bermejo B. Data from: Missed Opportunities for Vaccination in MSF-  
14  
15 378 Supported Health Facilities. [Internet]. Open Science Framework. Available from:  
16  
17 <https://doi.org/10.17605/OSF.IO/SFXDK>  
18 379  
19

20  
21 380 **Figure 1. Flow chart of participants' inclusion and for determining Missed Opportunities**  
22  
23 381 **for Vaccination (MOV), MSF-supported health facilities, 2011-2015**

24  
25  
26 382 *\*32 children were not included due to data inconsistencies.*  
27  
28  
29  
30  
31  
32  
33  
34  
35  
36  
37  
38  
39  
40  
41  
42  
43  
44  
45  
46  
47  
48  
49  
50  
51  
52  
53  
54  
55  
56  
57  
58  
59  
60

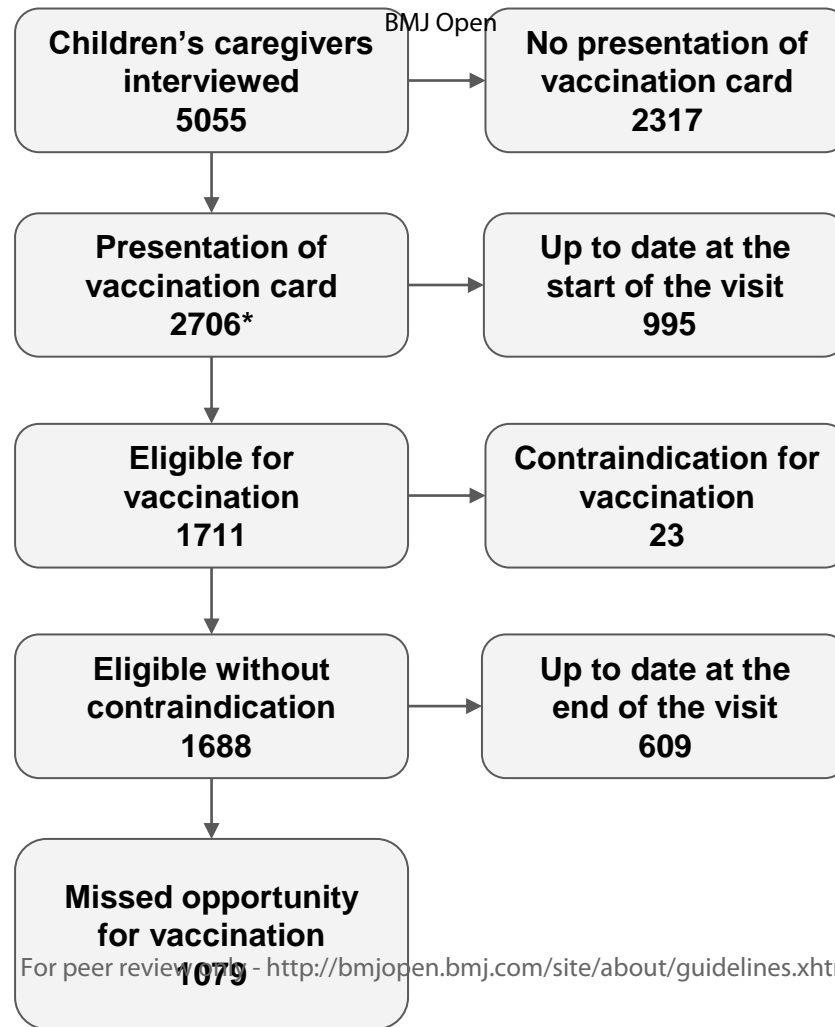

1  
2  
3  
4  
5  
6  
7  
8  
9  
10  
11  
12  
13  
14  
15  
16  
17  
18  
19  
20  
21  
22  
23  
24  
25  
26  
27  
28  
29  
30



## Evaluation of missed vaccination opportunities: child questionnaire

District: .....

Team: .....

N° child: 

Center: .....

Date: ..... / ..... / .....

Age of the child: ..... years ..... months

1) Do you have a vaccination card or a health book for the child?

 No     Yes    →    Did you bring it today?     No     Yes
2) What was the main purpose of your visit to the health center today? (One answer only)

|                                                                                                                                               |                                                                                                                           |
|-----------------------------------------------------------------------------------------------------------------------------------------------|---------------------------------------------------------------------------------------------------------------------------|
| <input type="checkbox"/> Curative consultation<br><input type="checkbox"/> MCH consultation<br><input type="checkbox"/> Accompanying an adult | <input type="checkbox"/> Vaccination<br><input type="checkbox"/> Feeding program<br><input type="checkbox"/> Other: ..... |
|-----------------------------------------------------------------------------------------------------------------------------------------------|---------------------------------------------------------------------------------------------------------------------------|

3) Vaccination status:

Write the **dates** (dd/mm/yy) mentioned in the health book **and circle it** if vaccine given today.If the history of vaccination is only confirmed orally by the caretaker, write **H**.**Cross** the box (X) for the missing dose of vaccine that could have been given today.

|                         | Dose 0 | Dose 1 | Dose 2 | Dose 3 |
|-------------------------|--------|--------|--------|--------|
| <b>BCG</b>              | X      |        | X      | X      |
| <b>HepB birth dose</b>  |        | X      | X      | X      |
| <b>Polio</b>            |        |        |        |        |
| <b>DTP - HepB - Hib</b> | X      |        |        |        |
| <b>PCV 13</b>           | X      |        |        |        |
| <b>Rota</b>             | X      |        |        | X      |
| <b>Measles</b>          | X      |        |        | X      |
| <b>Yellow fever</b>     | X      |        | X      | X      |

4) Was the child eligible for a vaccine today?

 No    →    Do you know the date of your next vaccination?     No     Yes → **END**
 Yes    →    Did the child present with a true contra-indication to the vaccination today?

 No     Yes    →    **GO TO QUESTION 6**
5) Did the child receive all vaccines required today?
 Yes

(If X in box)

 No    →    Would you have accepted the vaccination today if proposed?

 Yes     No    → Why? .....

→ Reason(s) for not receiving all vaccines today? (One answer only)

|                                                                                                                                           |                                                                                                                                    |
|-------------------------------------------------------------------------------------------------------------------------------------------|------------------------------------------------------------------------------------------------------------------------------------|
| <input type="checkbox"/> Out of stock<br><input type="checkbox"/> Waiting time too long<br><input type="checkbox"/> Don't know the reason | <input type="checkbox"/> No vaccinator<br><input type="checkbox"/> Not enough information<br><input type="checkbox"/> Other: ..... |
|-------------------------------------------------------------------------------------------------------------------------------------------|------------------------------------------------------------------------------------------------------------------------------------|

6) Did you get an appointment for your next vaccination?

 No     Yes

**THANK YOU FOR YOUR PARTICIPATION!**

STROBE Statement—Checklist of items that should be included in reports of *cross-sectional studies*

|                              | Item No | Recommendation                                                                                                                                                                                               | Page No |
|------------------------------|---------|--------------------------------------------------------------------------------------------------------------------------------------------------------------------------------------------------------------|---------|
| <b>Title and abstract</b>    | 1       | (a) Indicate the study's design with a commonly used term in the title or the abstract                                                                                                                       | 2       |
|                              |         | (b) Provide in the abstract an informative and balanced summary of what was done and what was found                                                                                                          | 2       |
| <b>Introduction</b>          |         |                                                                                                                                                                                                              |         |
| Background/rationale         | 2       | Explain the scientific background and rationale for the investigation being reported                                                                                                                         | 4       |
| Objectives                   | 3       | State specific objectives, including any prespecified hypotheses                                                                                                                                             | 4       |
| <b>Methods</b>               |         |                                                                                                                                                                                                              |         |
| Study design                 | 4       | Present key elements of study design early in the paper                                                                                                                                                      | 4-5     |
| Setting                      | 5       | Describe the setting, locations, and relevant dates, including periods of recruitment, exposure, follow-up, and data collection                                                                              | 4-5     |
| Participants                 | 6       | (a) Give the eligibility criteria, and the sources and methods of selection of participants                                                                                                                  | 5       |
| Variables                    | 7       | Clearly define all outcomes, exposures, predictors, potential confounders, and effect modifiers. Give diagnostic criteria, if applicable                                                                     | 5-6     |
| Data sources/<br>measurement | 8*      | For each variable of interest, give sources of data and details of methods of assessment (measurement). Describe comparability of assessment methods if there is more than one group                         | 5-6     |
| Bias                         | 9       | Describe any efforts to address potential sources of bias                                                                                                                                                    | 5       |
| Study size                   | 10      | Explain how the study size was arrived at                                                                                                                                                                    | NA      |
| Quantitative variables       | 11      | Explain how quantitative variables were handled in the analyses. If applicable, describe which groupings were chosen and why                                                                                 | 6-7     |
| Statistical methods          | 12      | (a) Describe all statistical methods, including those used to control for confounding                                                                                                                        | 7       |
|                              |         | (b) Describe any methods used to examine subgroups and interactions                                                                                                                                          | 7       |
|                              |         | (c) Explain how missing data were addressed                                                                                                                                                                  | 6       |
|                              |         | (d) If applicable, describe analytical methods taking account of sampling strategy                                                                                                                           | NA      |
|                              |         | (e) Describe any sensitivity analyses                                                                                                                                                                        | NA      |
| <b>Results</b>               |         |                                                                                                                                                                                                              |         |
| Participants                 | 13*     | (a) Report numbers of individuals at each stage of study—eg numbers potentially eligible, examined for eligibility, confirmed eligible, included in the study, completing follow-up, and analysed            | 6       |
|                              |         | (b) Give reasons for non-participation at each stage                                                                                                                                                         | 6       |
|                              |         | (c) Consider use of a flow diagram                                                                                                                                                                           | 6       |
| Descriptive data             | 14*     | (a) Give characteristics of study participants (eg demographic, clinical, social) and information on exposures and potential confounders                                                                     | 8       |
|                              |         | (b) Indicate number of participants with missing data for each variable of interest                                                                                                                          | NA      |
| Outcome data                 | 15*     | Report numbers of outcome events or summary measures                                                                                                                                                         | 8       |
| Main results                 | 16      | (a) Give unadjusted estimates and, if applicable, confounder-adjusted estimates and their precision (eg, 95% confidence interval). Make clear which confounders were adjusted for and why they were included | 9       |

|                          |    |                                                                                                                                                                            |       |
|--------------------------|----|----------------------------------------------------------------------------------------------------------------------------------------------------------------------------|-------|
|                          |    | (b) Report category boundaries when continuous variables were categorized                                                                                                  | 10    |
|                          |    | (c) If relevant, consider translating estimates of relative risk into absolute risk for a meaningful time period                                                           | NA    |
| Other analyses           | 17 | Report other analyses done—eg analyses of subgroups and interactions, and sensitivity analyses                                                                             | NA    |
| <b>Discussion</b>        |    |                                                                                                                                                                            |       |
| Key results              | 18 | Summarise key results with reference to study objectives                                                                                                                   | 11    |
| Limitations              | 19 | Discuss limitations of the study, taking into account sources of potential bias or imprecision. Discuss both direction and magnitude of any potential bias                 | 13-14 |
| Interpretation           | 20 | Give a cautious overall interpretation of results considering objectives, limitations, multiplicity of analyses, results from similar studies, and other relevant evidence | 14    |
| Generalisability         | 21 | Discuss the generalisability (external validity) of the study results                                                                                                      | NA    |
| <b>Other information</b> |    |                                                                                                                                                                            |       |
| Funding                  | 22 | Give the source of funding and the role of the funders for the present study and, if applicable, for the original study on which the present article is based              | 1     |

\*Give information separately for exposed and unexposed groups.

**Note:** An Explanation and Elaboration article discusses each checklist item and gives methodological background and published examples of transparent reporting. The STROBE checklist is best used in conjunction with this article (freely available on the Web sites of PLoS Medicine at <http://www.plosmedicine.org/>, Annals of Internal Medicine at <http://www.annals.org/>, and Epidemiology at <http://www.epidem.com/>). Information on the STROBE Initiative is available at [www.strobe-statement.org](http://www.strobe-statement.org).

# BMJ Open

## Missed Opportunities for Vaccination (MOV) in children up to 5 years old in 19 Médecins Sans Frontières-supported health facilities: a cross-sectional survey in six low resource countries.

|                                 |                                                                                                                                                                                                                                                                                                                                                                                                                                                                                                                                                     |
|---------------------------------|-----------------------------------------------------------------------------------------------------------------------------------------------------------------------------------------------------------------------------------------------------------------------------------------------------------------------------------------------------------------------------------------------------------------------------------------------------------------------------------------------------------------------------------------------------|
| Journal:                        | <i>BMJ Open</i>                                                                                                                                                                                                                                                                                                                                                                                                                                                                                                                                     |
| Manuscript ID                   | bmjopen-2021-059900.R1                                                                                                                                                                                                                                                                                                                                                                                                                                                                                                                              |
| Article Type:                   | Original research                                                                                                                                                                                                                                                                                                                                                                                                                                                                                                                                   |
| Date Submitted by the Author:   | 01-Apr-2022                                                                                                                                                                                                                                                                                                                                                                                                                                                                                                                                         |
| Complete List of Authors:       | Borras-Bermejo, Blanca; Preventive Medicine and Epidemiology Department, Vall d'Hebron Institut de Recerca (VHIR), Vall d'Hebron Hospital Universitari, Barcelona, Spain<br>Panunzi, Isabella; Medical Department, Operational Centre Brussels, Médecins Sans Frontières, Brussels, Belgium<br>Bachy, Catherine; Medical Department, Operational Centre Brussels, Médecins Sans Frontières, Brussels, Belgium<br>Gil-Cuesta, Julita; Luxembourg Operational Research Unit, Operational Centre Brussels, Médecins Sans Frontières, Brussels, Belgium |
| <b>Primary Subject Heading</b>: | Health policy                                                                                                                                                                                                                                                                                                                                                                                                                                                                                                                                       |
| Secondary Subject Heading:      | Epidemiology, Public health, Infectious diseases                                                                                                                                                                                                                                                                                                                                                                                                                                                                                                    |
| Keywords:                       | Public health < INFECTIOUS DISEASES, Epidemiology < INFECTIOUS DISEASES, Organisation of health services < HEALTH SERVICES ADMINISTRATION & MANAGEMENT, Paediatric infectious disease & immunisation < PAEDIATRICS, Community child health < PAEDIATRICS                                                                                                                                                                                                                                                                                            |
|                                 |                                                                                                                                                                                                                                                                                                                                                                                                                                                                                                                                                     |

SCHOLARONE™  
Manuscripts



I, the Submitting Author has the right to grant and does grant on behalf of all authors of the Work (as defined in the below author licence), an exclusive licence and/or a non-exclusive licence for contributions from authors who are: i) UK Crown employees; ii) where BMJ has agreed a CC-BY licence shall apply, and/or iii) in accordance with the terms applicable for US Federal Government officers or employees acting as part of their official duties; on a worldwide, perpetual, irrevocable, royalty-free basis to BMJ Publishing Group Ltd ("BMJ") its licensees and where the relevant Journal is co-owned by BMJ to the co-owners of the Journal, to publish the Work in this journal and any other BMJ products and to exploit all rights, as set out in our [licence](#).

The Submitting Author accepts and understands that any supply made under these terms is made by BMJ to the Submitting Author unless you are acting as an employee on behalf of your employer or a postgraduate student of an affiliated institution which is paying any applicable article publishing charge ("APC") for Open Access articles. Where the Submitting Author wishes to make the Work available on an Open Access basis (and intends to pay the relevant APC), the terms of reuse of such Open Access shall be governed by a Creative Commons licence – details of these licences and which [Creative Commons](#) licence will apply to this Work are set out in our licence referred to above.

Other than as permitted in any relevant BMJ Author's Self Archiving Policies, I confirm this Work has not been accepted for publication elsewhere, is not being considered for publication elsewhere and does not duplicate material already published. I confirm all authors consent to publication of this Work and authorise the granting of this licence.

## Title Page

**Title: Missed Opportunities for Vaccination (MOV) in children up to 5 years old in 19 Médecins Sans Frontières-supported health facilities: a cross-sectional survey in six low resource countries.**

**Running Title:** MOV in MSF supported health facilities

**Key words:** vaccine, vaccination, children, immunization program, health policy, process assessment, survey, low-income countries, Expanded Program of Immunization, missed opportunities, MOV, catch-up

## Authors

Blanca Borrás-Bermejo<sup>1</sup>, Isabella Panunzi<sup>2\*</sup>, Catherine Bachy<sup>2\*</sup>, Julita Gil-Cuesta<sup>2,3</sup>

## Affiliations

<sup>1</sup> Preventive Medicine and Epidemiology Department, Vall d'Hebron Institut de Recerca (VHIR), Vall d'Hebron Hospital Universitari, Barcelona, Spain

<sup>2</sup> Medical Department, Operational Centre Brussels, Médecins Sans Frontières, Brussels, Belgium

<sup>3</sup> Luxembourg Operational Research Unit, Operational Centre Brussels, Médecins Sans Frontières, Brussels, Belgium

\* These authors contributed equally

## Corresponding author:

Blanca Borrás-Bermejo, MD, MPH  
Preventive Medicine and Epidemiology Department, Hospital Universitari Vall d'Hebron  
Passeig Vall d'Hebron 119-129, 08035 Barcelona, Spain  
Phone: +34 93 489 42 10  
[bborras@vhebron.net](mailto:bborras@vhebron.net)

1  
2  
3 **Title: Missed Opportunities for Vaccination (MOV) in children up to 5 years old in 19**  
4 **Médecins Sans Frontières-supported health facilities: a cross-sectional survey in six low**  
5 **resource countries.**  
6  
7

8  
9 **Abstract**

10  
11 **Objective**

12  
13  
14 To describe Missed Opportunities for Vaccination (MOV) among children visiting MSF-  
15 supported facilities, their related factors, and to identify reasons for non-vaccination.  
16

17  
18 **Design:** Cross-sectional surveys conducted between 2011 and 2015.  
19

20  
21 **Setting and participants:** children up to 59 months of age visiting 19 MSF-supported  
22 facilities (15 primary health care centers and 4 hospitals) in Afghanistan, Democratic  
23 Republic of the Congo, Mauritania, Niger, Pakistan and South Sudan. Only children whose  
24 caregivers presented their vaccination card were included.  
25  
26

27  
28 **Outcome measures:** We describe MOV prevalence and reasons for no vaccination. We also  
29 assess the association of MOV with age, type of facility and reason for visit.  
30

31  
32 **Results:** Among 5055 children's caregivers interviewed, 2738 presented a vaccination card of  
33 whom 62.8% were eligible for vaccination and of those, 64.6% had a MOV. Presence of  
34 MOV was more likely in children visiting a hospital or a health facility for a reason other than  
35 vaccination. MOV occurrence was significantly higher among children aged 12-23 months  
36 (84.4%) and 24-59 months (88.3%) compared with children below 12 months (56.2%,  
37  $p \leq 0.001$ ). Main reasons reported by caregivers for MOV were lack of vaccines (40.3%),  
38 reason unknown (31.2%), and not being informed (17.6%).  
39  
40  
41  
42  
43

44  
45 **Conclusions**

46  
47 Avoiding MOV should remain a priority in low-resource settings, in line with the new 2030  
48 Immunization Agenda. Children beyond the Expanded Program of Immunization are  
49 particularly vulnerable for MOV. We strongly recommend assessment of eligibility for  
50 vaccination as routine health care practice regardless of the reason for the visit by screening  
51 vaccination card. Strengthening implementation of "Second year of life" visits and catch-up  
52 activities are proposed strategies to reduce MOV.  
53  
54  
55  
56  
57  
58  
59  
60

### Strengths and limitations of this study

- The major strength of the study is that only children with a valid vaccination card were included, so not relying on self-reported data helped to avoid potential recall bias
- Differences by gender on Missed Opportunities for Vaccination were not explored
- Reasons related with Missed Opportunities for Vaccination were limited to those included at the questionnaire and declared by caregivers.

For peer review only



## 1 INTRODUCTION

2 Since 1983, the Expanded Program of Immunization (EPI) has recommended using every  
3 health care visit as an opportunity to immunize each eligible child, regardless of the reason for  
4 consultation. A Missed Opportunity for Vaccination (MOV) occurs when a child eligible for  
5 vaccination (without contraindication) remains unvaccinated or partially vaccinated (not up-  
6 to-date) at the end of the visit, so the consultation does not result in the children receiving all  
7 the vaccine doses for which he or she was eligible. Among the causes for under-vaccination in  
8 low and middle-income countries, 44% are for reasons related to health systems, including  
9 MOV and lack of access to health care (1). In 1993, the first systematic review including 45  
10 countries found a median MOV prevalence of 67% (2), and despite increases in routine  
11 vaccination coverage since then, MOV remain as high as 32% in the last systematic review  
12 performed in 2014 (3). Since then, the World Health Organization (WHO) has promoted the  
13 use of MOV assessments to measure the performance of health services in vaccination (4)(5).  
14 In order to improve immunization coverage, in 2017 WHO recommended a revised  
15 methodology to assess MOV, targeting children aged 0-23 months (6). However, data is  
16 scarce on MOV prevalence in children above 23 months of age (3). Through its medical  
17 humanitarian programs in low and middle-income countries, Médecins Sans Frontières (MSF)  
18 strengthens routine vaccination services regardless the age of the child, following WHO  
19 recommendations (7), in order to reduce the number of under and unvaccinated children.  
20 Therefore, we took the opportunity to systematically assess MOV in children up to five years  
21 of age within MSF programs.

22 Our objective was to describe MOV prevalence and its characteristics, and to identify reasons  
23 for non-vaccination among children up to five years of age visiting MSF-supported health  
24 facilities in six different countries.

## 25 **METHODS**

### 26 **Study design and settings**

27 A cross-sectional exit survey of caregivers was performed in 19 health facilities. They  
28 included four hospitals and 15 primary health care centers (PHCC) between 2011 and 2015 in  
29 six countries: Afghanistan, Democratic Republic of the Congo, Mauritania, Niger, Pakistan  
30 and South Sudan. Countries, health facilities and time of the assessments were chosen on a  
31 convenient basis following operational reasons. Facilities included were chosen because MSF  
32 was already supporting routine vaccination and where MOV training to local staff was  
33 feasible in those health facilities.

### 34 **Patient and Public Involvement**

35 Patients or the public were not involved in the design, conduct, reporting or dissemination  
36 plans of our research.

### 37 **Study population and participant selection**

38 The study population consisted of children up to five years of age accompanied by a  
39 caregiver, visiting an MSF-supported facility. A convenience sample of all caregivers  
40 accompanying a child under five years of age was approached on the day of the survey at each  
41 facility. Caregivers were invited to participate when exiting the facility, regardless of the  
42 reason for their visit, and those who provided oral consent were interviewed. If several  
43 children were present with one caregiver, all were included. Children whose caregivers could  
44 not present a vaccination card were excluded from the analysis.

### 45 **Data collection**

46 MSF developed a standardized methodology to assess MOV based on the 1988 WHO tool  
47 (8). Interviews were conducted in local languages. In preparation for the survey, surveyors

1  
2  
3 48 locally recruited received two days of training focusing on conducting the interview and  
4  
5 49 identifying eligible children for vaccination according to national vaccination schedules, age  
6  
7 50 of the child and minimum interval between doses.  
8  
9

10 51 A structured questionnaire was created (Annex 1) and used in all assessments. Information  
11  
12 52 on type of facility (hospital or PHCC), age of the child, presentation of a vaccination card,  
13  
14 53 reason for visiting the facility and vaccination history were collected, as well as whether there  
15  
16 54 was a contraindication for vaccination. We considered as contraindications, fever above 38,5  
17  
18 55 °C and a severe allergic reaction to a previous dose of DTP-containing or measles-containing  
19  
20 56 vaccines. For those who had not received any of the recommended vaccines during the visit,  
21  
22 57 surveyors asked for reasons why the child was not vaccinated, whether caregivers accepted  
23  
24 58 receiving the missing vaccines doses, and about their awareness of the next vaccination  
25  
26 59 appointment.  
27  
28  
29  
30  
31

32 60 We classified children as having a MOV as per standard WHO's definition (6): a MOV  
33  
34 61 occurs when a child eligible for vaccination (without contraindication) remains unvaccinated  
35  
36 62 or partially vaccinated (not up to date) at the end of any visit to a health facility (Figure 1).  
37  
38

39 63 Surveyors determined if the child was eligible that day of the assessment for at least one  
40  
41 64 vaccine dose according to age and National immunization schedules (Figure 2), and whether  
42  
43 65 the child had received all the recommended vaccines during that visit. Most of National  
44  
45 66 immunization programs allowed vaccination until 12 months of age by the time of the  
46  
47 67 assessments. Nevertheless, MSF supported vaccination of children up to 5 years of age in  
48  
49 68 each of these facilities. In our study, surveyors considered a MOV if a child did not receive  
50  
51 69 the indicated vaccines even if they were above the recommended age to receive them  
52  
53 70 according to the country policy, to the exception of BCG and Rotavirus (Figure 2). Only  
54  
55  
56  
57  
58  
59  
60

1  
2  
3 71 widely introduced vaccines in each country were considered to ascertain MOV. Year of  
4  
5 72 vaccine introduction in each country can be consulted here (9).  
6  
7

8 73 For those having a MOV, surveyors asked for reasons why the child was not vaccinated,  
9  
10 74 whether caregivers would have accepted receiving the missing vaccines doses, and about their  
11  
12  
13 75 awareness of the next vaccination appointment.  
14  
15

## 16 76 **Data analysis**

17  
18  
19 77 We calculated the prevalence of MOV among children eligible for a vaccination, excluding  
20  
21 78 those with a reported contraindication. Among children with a MOV we calculated the  
22  
23 79 proportion of caregivers who would have accepted vaccination if it had been proposed on the  
24  
25  
26 80 day of the visit and the proportion of caregivers who knew their date of next vaccination  
27  
28 81 appointment.  
29  
30

31 82 Proportions were used to describe the children and to estimate MOV. Significant differences  
32  
33 83 in the distribution were assessed using the Pearson's two-sided Chi-square test or Fisher exact  
34  
35  
36 84 test. For the bivariate analysis, age was categorized as below and above 12 months of age as  
37  
38 85 this was the main target of the National program schedules in countries included at the time  
39  
40  
41 86 the survey was performed. Reasons for visit to the facility were grouped into either  
42  
43 87 vaccination or others. We assessed the association of MOV with age, type of facility and  
44  
45 88 reason for visit by calculating Odds Ratios. A logistic regression model was adjusted for age  
46  
47 89 (0-11,12-59 months), type of facility (hospital, PHCC), and reason for visit (vaccination,  
48  
49 90 other reason). The level of statistical significance was set at  $p < 0.05$ .

50  
51  
52 91 In each facility, data entry officers inputted the paper questionnaire data into an Excel  
53  
54 92 database, which was validated by two of the study investigators. The analysis was performed  
55  
56  
57 93 using STATA (version 16, College Station, Texas).  
58

## 59 94 **Ethics issues**

60

1  
2  
3 95 Prior to each evaluation, authorization from the local health authorities and from the director  
4  
5 96 of each health facility was obtained. Oral consent was received from each caregiver. During  
6  
7 97 the survey, children <12 months identified with MOV were sent back to the vaccination unit  
8  
9 98 to receive the missing vaccine(s) if the caregiver agreed and if there was no shortage. All data  
10  
11 99 from the questionnaires were anonymous and entered into a dedicated password-protected  
12  
13 100 electronic database. This research fulfilled the exemption criteria by Médecins sans Frontières  
14  
15 101 Ethics Review Board (MSF ERB) for a posteriori analysis of routinely collected clinical data  
16  
17 102 and thus did not require MSF ERB review. It was conducted with permission from the  
18  
19 103 Medical Director, Operational Centre Brussels Médecins sans Frontières.  
20  
21  
22  
23

## 24 104 **RESULTS**

25  
26  
27 105 From 2011 to 2015, the caregivers of 5055 children were interviewed in 19 facilities (four  
28  
29 106 hospitals and 15 PHCCs). We report the results for the 2706 (53.5%) children who presented  
30  
31 107 their vaccination card on the day of the survey: 33 from Afghanistan, 79 from Democratic  
32  
33 108 Republic of the Congo, 244 from Mauritania, 1888 from Niger, 15 from Pakistan and 447  
34  
35 109 from South Sudan. Characteristics of children not presenting vaccination cards can be  
36  
37 110 consulted at Supplementary table 1.  
38  
39  
40  
41

### 42 111 **Characteristics of the study population**

43  
44  
45 112 Among the 2706 children included, 995 (36.7%) were already up to date before the visit, and  
46  
47 113 1711 (63.2%) were eligible for vaccination. Twenty-three caregivers (1.3%) reported a  
48  
49 114 contraindication (Figure 1). Among eligible children, 609 (36.1%) were vaccinated during the  
50  
51 115 visit, whereas 1079 (63.9%) experienced a MOV during their health facility visit.  
52  
53  
54

55 116 Children's baseline characteristics are presented in Table 1. Their mean age was 10.1 months  
56  
57 117 (Standard Deviation - 9). The majority (2213, 81.8%) were interviewed at exit of a PHCC.  
58  
59 118 Reasons for visiting the health facility were distributed among curative consultation (31%),  
60

1  
2  
3 119 followed by unspecified reason (26%), vaccination (16%), nutrition (16%), mother and child  
4  
5 120 health visit (10%) and accompanying an adult (1%).  
6  
7

### 8 121 **Characteristics of children with MOV**

9  
10  
11 122 Most children who were eligible for vaccination and consulting for a reason other than  
12  
13 123 vaccination, had a MOV (n=960, 71.9%), while a third of the children coming to the facility  
14  
15 124 for vaccination also had a MOV (n=119, 33.7%). More than 80% of children aged 12-23  
16  
17 125 months (265/314) and almost 90% of children aged 23-59 (151/171) had a MOV, compared  
18  
19 126 to 55% of children below 12 months (663/1203). MOV occurrence was significantly more  
20  
21 127 likely among older children than younger ones (Table 1). Differences in MOV by country can  
22  
23 128 be consulted at Supplementary table 3.  
24  
25

26  
27  
28 129 Only four caregivers of children with MOV would have refused vaccination if it had been  
29  
30 130 proposed during the visit. About one fifth (21%) of caregivers of children with MOV were  
31  
32 131 aware of the date of the next vaccination appointment.  
33  
34

35  
36 132 The commonest reason declared for having a MOV was lack of vaccines (40.1%), followed  
37  
38 133 by reason unknown (32%), not being informed (17.3%), lack of staff (3.3%), waiting time too  
39  
40 134 long (1.7%) and other unclassified reasons (5.6%).  
41  
42

### 43 135 **Factors related with presence of MOV**

44  
45  
46 136 Children above 12 months of age and those accessing the health facility for a reason other  
47  
48 137 than vaccination, had an almost five times higher risk of having a MOV (Table 2), compared  
49  
50 138 to children below 12 months of age and those visiting for vaccination. Children visiting a  
51  
52 139 hospital had a 2.7 times higher risk of having a MOV compared to children visiting a PHCC.  
53  
54 140 After adjusting by type of facility and reason for visit, children above 12 months still had a  
55  
56 141 significantly higher risk of having a MOV (adjusted OR: 1.7, 95% CI 1.1-2.5).  
57  
58  
59  
60 142

**Table 1. Characteristics of children who visited MSF-supported health facilities and the presence of Missed Opportunities for Vaccination (MOV), 2011-2015**

|                            | Total children<br>n=2706<br>n (%) | Eligible for<br>vaccination <sup>a</sup><br>n=1688<br>n (%) <sup>b</sup> | MOV                      |                           | p value             |
|----------------------------|-----------------------------------|--------------------------------------------------------------------------|--------------------------|---------------------------|---------------------|
|                            |                                   |                                                                          | No<br>n (%) <sup>c</sup> | Yes<br>n (%) <sup>c</sup> |                     |
| <b>Age groups</b>          |                                   |                                                                          |                          |                           |                     |
| <12 m                      | 1805 (66.7)                       | 1203 (66.5)                                                              | 540 (44.9)               | 663 (55.1)                | <0,001 <sup>e</sup> |
| 12-23 m                    | 597 (22.1)                        | 314 (52.6)                                                               | 49 (15.6)                | 265 (84.4)                |                     |
| 24-59 m                    | 304 (11.2)                        | 171 (56.3)                                                               | 20 (11.7)                | 151 (88.3)                |                     |
| <b>Facility type</b>       |                                   |                                                                          |                          |                           |                     |
| Hospital                   | 493 (18.2)                        | 336 (68.2)                                                               | 67 (20)                  | 269 (80.1)                | <0,001 <sup>e</sup> |
| PHCC <sup>d</sup>          | 2213 (81.8)                       | 1352 (61.1)                                                              | 542 (40.1)               | 810 (59.9)                |                     |
| <b>Reason of the visit</b> |                                   |                                                                          |                          |                           |                     |
| Curative                   | 831 (30.7)                        | 513 (61.7)                                                               | 40 (7.8)                 | 473 (92.2)                | <0,001 <sup>f</sup> |
| Other                      | 706 (26.1)                        | 311 (44.1)                                                               | 281 (90.4)               | 30 (9.7)                  |                     |
| Vaccination                | 436 (16.1)                        | 353 (81.0)                                                               | 234 (64.3)               | 119 (33.7)                |                     |
| Nutrition                  | 430 (15.9)                        | 275 (64.0)                                                               | 23 (8,4)                 | 252 (91.6)                |                     |
| Mother Child Health visit  | 265 (9.8)                         | 214 (80.8)                                                               | 29 (13.6)                | 185 (86.5)                |                     |
| Accompanying               | 38 (1.4)                          | 22 (57.9)                                                                | 2 (9.0)                  | 20 (90.9)                 |                     |

<sup>a</sup> Without contraindication for vaccination

<sup>b</sup> Row percentage over the total children

<sup>c</sup> Row percentage over the eligible children without contraindication for vaccination

<sup>d</sup> PHCC: Primary Health Care Center

<sup>e</sup> Chi square test

<sup>f</sup> Fisher exact test

**Table 2. Factors related to Missed Opportunities for Vaccination (MOV) in eligible children who visited MSF-supported health facilities, 2011-2015**

|                            | MOV<br>children<br>n= 1079<br>n (%) | Odds Ratio<br>(95%CI) | Adjusted Odds<br>Ratio<br>(95%CI) |
|----------------------------|-------------------------------------|-----------------------|-----------------------------------|
| <b>Age in months</b>       |                                     |                       |                                   |
| 0-11 m                     | 663 (55.1)                          |                       |                                   |
| 12-59 m                    | 416 (85.8)                          | 4.91 (3.67-6.57)      | 3.79 (2.84-5.07)                  |
| <b>Reason for visiting</b> |                                     |                       |                                   |
| Vaccination                | 119 (33.7)                          |                       |                                   |
| Other                      | 960 (89.0)                          | 5.03 (3.86-6.56)      | 3.52 (2.70-4.58)                  |
| <b>Facility type</b>       |                                     |                       |                                   |
| PHCC <sup>a</sup>          | 810 (59.9)                          |                       |                                   |
| Hospital                   | 269 (80.1)                          | 2.69 (2.00-3.60)      | 2.75 (2.02-3.73)                  |

<sup>a</sup> PHCC: Primary Health Care Center

Odds ratio adjusted for age, reason for visiting, facility type (two categories each)

## 157 **DISCUSSION**

158 This study summarizes the MSF experience and lessons learned assessing MOV from 2011 to  
159 2015 in six low-income countries. To our knowledge, this is one of the few studies that  
160 assessed MOV in children beyond 23 months of age. Our results highlight that, despite MSF's  
161 efforts, most children had a MOV after visiting one of the facilities. Even among those  
162 children who specifically visited for vaccination, one third still missed at least one dose of a  
163 vaccine for which they were eligible during the visit. The proportion of children with MOV  
164 increased with age, with children above one year of age being at higher risk.

165 MOV prevalence in our study (64%) was higher than the last systematic review conducted in  
166 low income countries in 2014, which found a prevalence of 32% (26.8–37.7) (3). An  
167 explanation could be that the majority of studies in this meta-analysis only included children  
168 below two years of age resulting in a lower estimation of MOV. As our data show, MOV was  
169 nearly 90% in children above 23 months of age. One of the few studies to include older  
170 children also reported that MOV prevalence was higher in children aged 1-5 years (56.6%),  
171 compared to those below one year (31.4%) (10). Thus, we believe that overall MOV  
172 prevalence is being seriously underestimated, as assessments do not include children beyond  
173 the EPI age target for most vaccines, that is, above 23 months of age.

174 Consistent with recent studies in low-income countries (11), we found a higher MOV  
175 prevalence in children above 12 months. In a recent study that assessed MOV with WHO  
176 methodology in Chad and Malawi (12), Ogbuano et al. found a MOV prevalence of 86% in  
177 Chad and 94% in Malawi among children above one year of age, compared to 49% and 61%  
178 below one year, respectively.

179 Age as a risk for having MOV may be explained by older children having been perceived as  
180 “too old” to be eligible (13), as most National immunization programs only target children



1  
2  
3 181 below one year of age. Age as a false contraindication was found to be one of the main  
4  
5 182 reasons for having a MOV in a WHO review about factors related with under-vaccination  
6  
7 183 (14). But efforts are being made to ‘Leave No One Behind’ (15): the latest WHO update of  
8  
9 184 recommendations for routine immunization (16) emphasizes that measles vaccine should not  
10  
11 185 be limited to children up to 12 months of age. Actually, there are no age limits to vaccinate  
12  
13 186 children (with rotavirus exception). In line with that, a “second year of life healthy child visit”  
14  
15 187 is already recommended by WHO (17)(7) increasing the opportunity to vaccinate children,  
16  
17 188 especially in those who might have missed vaccination in their first year of life. This strategy,  
18  
19 189 together with complementary catch-up activities to continue screening children at any contact  
20  
21 190 with health services, should be strengthened in low-resource settings (7)(18)(19)(20). We  
22  
23 191 believe this ‘never too old’ policy should be adopted by all national immunization programs  
24  
25 192 in order to ensure children do not miss the opportunity to be fully vaccinated at any age.  
26  
27  
28  
29  
30  
31  
32 193 Our data draw attention to the high proportion of children missing an opportunity to get  
33  
34 194 vaccinated at hospital level. A similar proportion has been found in a recent study performed  
35  
36 195 in northern Indian hospitals (21). This could be explained by vaccine shortage at hospital  
37  
38 196 level but also by the belief in the false contraindication for vaccination in a sick child among  
39  
40 197 caregivers and health care workers. For example, a study in Haiti reported that up to 13% of  
41  
42 198 reasons for under-vaccination was child illness, despite the fact that mild infections should not  
43  
44 199 prevent vaccination (22). A similar finding is highlighted in a MOV assessment in East Timor  
45  
46 200 (13) were Anyie J. Li et al. found that only 24% of health care workers were able to identify  
47  
48 201 true contraindications, and L. Kaboré et al. (11) reported that 83% of health workers failed to  
49  
50 202 correctly identify valid contraindications for vaccination. This could be avoided through the  
51  
52 203 proper adherence to the Integrated Management of Newborn and Childhood Illnesses  
53  
54 204 (IMNCI) guidelines (19), already in place in these countries (23).  
55  
56  
57  
58  
59  
60

1  
2  
3 205 We identified that one third of children actually visiting for vaccination were still not up to  
4  
5 206 date at the end of the visit despite being vaccinated with one or more doses. Similar estimates  
6  
7 207 were found in four recent MOV assessments in East Timor, Chad, Malawi, and Burkina Faso  
8  
9 208 (11)(12)(13). This could be explained by supply shortages of specific vaccines, but also by  
10  
11 209 health workers potentially failing to identify eligibility for certain vaccines. Failure to  
12  
13 210 administer simultaneous vaccines due to fear of wasting doses from multi-vial vaccines has  
14  
15 211 been also suggested as an explanation for remaining MOV after vaccination visits (24)(25).  
16  
17 212 Among reasons for MOV in our study, almost 20% reported not being informed by health  
18  
19 213 care workers about the eligibility of the child for vaccination. This lack of information on  
20  
21 214 vaccine eligibility has also been reported elsewhere (26). Therefore, promoting training on  
22  
23 215 eligibility assessment and true contraindications for vaccination among health care workers  
24  
25 216 could be an effective strategy to reduce MOV (27).

26  
27  
28  
29  
30  
31 217 Over three-quarters of eligible children consulting for reasons other than vaccination (mother-  
32  
33 218 and-child health visits, nutrition, curative) had a MOV. This highlights the need of  
34  
35 219 strengthening routine screening of vaccination status that must be done irrespective of reason  
36  
37 220 visit. Caregivers should be encouraged to bring the vaccination card to every contact with  
38  
39 221 health services, to facilitate and ensure that the child can be properly screened for vaccination  
40  
41 222 eligibility. So, integrating vaccination into other preventive or curative services at hospital  
42  
43 223 and at primary health care level, could facilitate a significant reduction on MOV (28)(29).

44  
45  
46  
47  
48 224 In our study, caregivers reported lack of vaccines as the main reason for MOV. This is  
49  
50 225 consistent with recent MOV assessments (12), where approximately 30% of health care  
51  
52 226 workers reported insufficient vaccine supply or logistics issues. Inadequate vaccine supply  
53  
54 227 has already been pointed out as one of the main reasons for under vaccination in low income  
55  
56 228 countries (1). Ministries of Health and their partners must work to ensure adequate vaccine  
57  
58  
59  
60

1  
2  
3 229 supply at facility level in order be able to vaccinate any children who have accessed health  
4  
5 230 care services (30).  
6  
7

8 231 This study has three main limitations. First, gender was not collected, losing the opportunity  
9  
10 232 to uncover gender differences. Nevertheless, no gender differences in the distribution of MOV  
11  
12 233 have been reported in the latest studies (3)(12). Second, our survey didn't allow us to explore  
13  
14 234 health care providers' practices and perceptions, identified as one of the main reasons related  
15  
16 235 to MOV in the last systematic review (3). In 2015, WHO launched a revised MOV strategy,  
17  
18 236 which included Knowledge, Attitudes and Practices (KAP) questionnaires, to better guide the  
19  
20 237 implementation of interventions to reduce MOV (12); it is generating new evidence (31).  
21  
22 238 Also, we could not explore other factors that have been previously related to MOV such as  
23  
24 239 maternal education, living in rural areas, number of children and other economic inequalities  
25  
26 240 (32).  
27  
28  
29  
30  
31

32 241 Third, we excluded from the analysis almost half of the children whose caregivers could not  
33  
34 242 present a vaccination card. This may mean that we underestimated MOV prevalence in our  
35  
36 243 target population, since not presenting a vaccination card has shown to be associated with  
37  
38 244 MOV (1)(3)(33). On one hand, not relying on self-reported data helped avoid potential recall  
39  
40 245 bias, which is a limitation in vaccine coverage studies in low-resource settings (34). On the  
41  
42 246 other hand, possession of vaccination card declines with age (10) (a relation also observed in  
43  
44 247 our study, Supplementary table 1); what could result in an overestimated prevalence of MOV  
45  
46 248 in older children. Nevertheless, when assessing the relation between MOV and age including  
47  
48 249 those with and without vaccination card, we obtain similar results (Supplementary table 2).  
49  
50  
51  
52

53 250 Finally, as children with identified MOV were sent back for vaccination when possible, it  
54  
55 251 could have introduced a bias in MOV prevalence if these children were inadvertently  
56  
57  
58  
59  
60

1  
2  
3 252 interviewed again. Also, MOV prevalence estimates may have improved over the last ten  
4  
5 253 years, as WHO has lately reinforced EPI vaccination during the second year of life.  
6  
7

## 8 254 **CONCLUSIONS**

9  
10 255 Despite progress in vaccine coverage, MOV remains an important problem in low-resource  
11  
12 256 settings. Avoiding MOV should remain a priority where access to health care is limited, in  
13  
14 257 line with the new 2030 Immunization Agenda (15). This is particularly important considering  
15  
16 258 the negative impact COVID-19 pandemic is having on routine immunization programs in low  
17  
18 259 and middle-income countries (35)(36).  
19  
20  
21

22  
23 260 We recommend integrating systematic vaccination screening into routine health care services,  
24  
25 261 regardless of the reason for the visit, the type of facility and the age of the child. To promote  
26  
27 262 maintaining and providing vaccination cards at every health care visit will help to reinforce  
28  
29 263 vaccination screening and better identification of eligible children.  
30  
31

32  
33 264 We identified that children above 23 months of age are particularly vulnerable for MOV.  
34  
35 265 Thus, we would recommend including children beyond 23 months of age in the current WHO  
36  
37 266 methodology for MOV assessments in order to avoid underestimation of MOV. National  
38  
39 267 immunization programs should allow to administer missing doses regardless the age of the  
40  
41 268 child, as the EPI has expanded its vaccination recommendations during second year of life  
42  
43 269 and beyond. Strengthening the implementation of second-year-of-life visits, as recommended  
44  
45 270 by WHO, with catch-up vaccination strategies (7) would provide additional opportunities to  
46  
47 271 receive missed vaccine doses and *leave no one behind*.  
48  
49

## 50 272 **Acknowledgements**

51  
52  
53 273 We would like to thank all caregivers for sharing their invaluable time, and all health care  
54  
55 274 workers who performed the assessments. Special thanks to Ibrahim Barrie and Marie-Eve  
56  
57  
58  
59  
60

1  
2  
3 275 Burny for implementation of MOV studies in the field. Thanks to Tony Reid for language  
4  
5 276 review and to J.A. Rodrigo for his valuable input.  
6

### 277 **Contributorship Statement**

278 Bachy C. and Panunzi I. designed the study and contributed to conduct it in the six countries.  
279 Bachy C., Panunzi I., Gil-Cuesta J. and Borrás-Bermejo B. carried out the data analysis.  
280 Borrás-Bermejo B. drafted the manuscript that was critically reviewed and approved by all  
281 authors.

### 282 **Competing interests**

283 None declared

### 284 **Funding**

285 The study was carried out by MSF staff as part of their routine activities. No extra funding  
286 was required.

### 287 **Data Availability Statement**

288 Questionnaire dataset is available in a public, open access repository.

289 [dataset] Borrás-Bermejo B. Data from: Missed Opportunities for Vaccination in MSF-  
290 Supported Health Facilities. Open Science Framework. December 6, 2021.

291 <https://doi.org/10.17605/OSF.IO/SFXDK>

## 44 **References**

- 46 1. Rainey JJ, Watkins M, Ryman TK, Sandhu P, Bo A, Banerjee K. Reasons related to  
47 non-vaccination and under-vaccination of children in low and middle income countries:  
48 Findings from a systematic review of the published literature, 1999-2009. Vol. 29,  
49 Vaccine. 2011. p. 8215–21.
- 50 2. Hutchins SS, Jansen HAFM, Robertson SE, Evans P, Kin-Farley RJ. Studies of missed  
51 opportunities for immunization in developing and industrialized countries. Bull World  
52 Health Organ [Internet]. 1993 [cited 2019 Oct 25];71(5):549–60. Available from:  
53 <https://www.ncbi.nlm.nih.gov/pmc/articles/PMC2393481/>
- 54 3. Sridhar S, Maleq N, Guillermet E, Colombini A, Gessner BD. A systematic literature  
55 review of missed opportunities for immunization in low- and middle-income countries.  
56 Vaccine [Internet]. 2014 Dec 5 [cited 2019 Oct 11];32(51):6870–9. Available from:  
57  
58  
59  
60

- 1  
2  
3 <http://www.ncbi.nlm.nih.gov/pubmed/25444813>  
4  
5 4. Methodology for the Evaluation of Missed Opportunities for Vaccination [Internet].  
6 Pan American Health Organization. 2014. Available from:  
7 [https://www.paho.org/hq/dmdocuments/2015/MissedOpportunity-Vaccination-](https://www.paho.org/hq/dmdocuments/2015/MissedOpportunity-Vaccination-Protocol-2014.pdf)  
8 [Protocol-2014.pdf](https://www.paho.org/hq/dmdocuments/2015/MissedOpportunity-Vaccination-Protocol-2014.pdf)  
9  
10 5. Velandia-González M, Trumbo SP, Díaz-Ortega JL, Bravo-Alcántara P, Danovaro-  
11 Holliday MC, Dietz V, et al. Lessons learned from the development of a new  
12 methodology to assess missed opportunities for vaccination in Latin America and the  
13 Caribbean. 2011 Feb 21 [cited 2019 Oct 25];15(1):5. Available from:  
14 <http://www.ncbi.nlm.nih.gov/pubmed/25889653>  
15  
16 6. Methodology for the Assessment of Missed Opportunities for Vaccination [Internet].  
17 Geneva: World Health Organization. 2017 [cited 2021 Feb 22]. Available from:  
18 <https://apps.who.int/iris/handle/10665/259201>  
19  
20 7. Leave no one behind: guidance for planning and implementing catch-up vaccination  
21 [Internet]. Geneva: World Health Organization. 2021 [cited 2022 Feb 27]. Available  
22 from: [https://www.who.int/publications/i/item/leave-no-one-behind-guidance-for-](https://www.who.int/publications/i/item/leave-no-one-behind-guidance-for-planning-and-implementing-catch-up-vaccination)  
23 [planning-and-implementing-catch-up-vaccination](https://www.who.int/publications/i/item/leave-no-one-behind-guidance-for-planning-and-implementing-catch-up-vaccination)  
24  
25 8. Sato PA& WEP on I. Protocole pour l' évaluation des occasions manquées de  
26 vaccination / Paul Sato. 1998 [cited 2022 Mar 19]; Available from:  
27 <http://apps.who.int/iris/handle/10665/58643?locale-attribute=es&>  
28  
29 9. WHO Immunization Data portal [Internet]. [cited 2022 Mar 19]. Available from:  
30 <https://immunizationdata.who.int/listing.html?topic=&location=>  
31  
32 10. Garib Z, Vargas AL, Trumbo SP, Anthony K, Diaz-Ortega JL, Bravo-Alcántara P, et  
33 al. Missed Opportunities for Vaccination in the Dominican Republic: Results of an  
34 Operational Investigation. *Biomed Res Int* [Internet]. 2016 [cited 2019 Sep  
35 17];2016:4721836. Available from: <http://www.ncbi.nlm.nih.gov/pubmed/27819003>  
36  
37 11. Kaboré L, Meda B, Médah I, Shendale S, Nic Lochlainn L, Sanderson C, et al.  
38 Assessment of missed opportunities for vaccination (MOV) in Burkina Faso using the  
39 World Health Organization's revised MOV strategy: Findings and strategic  
40 considerations to improve routine childhood immunization coverage. *Vaccine*  
41 [Internet]. 2020 Nov 10 [cited 2021 Feb 22];38(48):7603–11. Available from:  
42 <https://www.ncbi.nlm.nih.gov/pmc/articles/PMC7604568/>  
43  
44 12. Ogbuanu IU, Li AJ, Anya BM, Tamadji M, Chirwa G, Chiwaya KW, et al. Can  
45 vaccination coverage be improved by reducing missed opportunities for vaccination?  
46 Findings from assessments in Chad and Malawi using the new WHO methodology.  
47 Uthman O, editor. *PLoS One* [Internet]. 2019 Jan 24 [cited 2019 Nov  
48 7];14(1):e0210648. Available from: <http://dx.plos.org/10.1371/journal.pone.0210648>  
49  
50 13. Li AJ, Peiris TSR, Sanderson C, Lochlainn LN, Mausiry M, da Silva RBJBM, et al.  
51 Opportunities to improve vaccination coverage in a country with a fledgling health  
52 system: Findings from an assessment of missed opportunities for vaccination among  
53 health center attendees—Timor Leste, 2016. *Vaccine*. 2019 Jul 18;37(31):4281–90.  
54  
55 14. Epidemiology of the Unimmunized Child. Findings from the Grey Literature. Prepared  
56 for the World Health Organization. October 2009. IMMUNIZATION basics Project.  
57 Geneva World Heal Organ [Internet]. 2009 [cited 2021 Feb 22]; Available from:

- 1  
2  
3 [https://www.who.int/immunization/sage/ImmBasics\\_Epid\\_unimm\\_Final\\_v2.pdf](https://www.who.int/immunization/sage/ImmBasics_Epid_unimm_Final_v2.pdf)  
4
- 5 15. World Health Organization. Immunization Agenda 2030: A Global Strategy to Leave  
6 No One Behind [Internet]. 2020 [cited 2021 Feb 22]. Available from:  
7 <https://www.who.int/teams/immunization-vaccines-and-biologicals/strategies/ia2030>  
8
- 9 16. Table 2: Summary of WHO Position Papers - Recommended Routine Immunizations  
10 for Children [Internet]. Geneva: World Health Organization. 2020 [cited 2021 Sep 18].  
11 Available from: [https://www.who.int/teams/immunization-vaccines-and-](https://www.who.int/teams/immunization-vaccines-and-biologicals/policies/who-recommendations-for-routine-immunization---summary-tables)  
12 [biologicals/policies/who-recommendations-for-routine-immunization---summary-](https://www.who.int/teams/immunization-vaccines-and-biologicals/policies/who-recommendations-for-routine-immunization---summary-tables)  
13 [tables](https://www.who.int/teams/immunization-vaccines-and-biologicals/policies/who-recommendations-for-routine-immunization---summary-tables)  
14
- 15 17. Establishing and strengthening immunization in the second year of life : Practices for  
16 vaccination beyond infancy [Internet]. Geneva: World Health Organization. 2018 [cited  
17 2021 Oct 28]. Available from:  
18 <https://apps.who.int/iris/bitstream/handle/10665/260556/9789241513678-eng.pdf>  
19
- 20 18. Standards for improving the quality of care for children and young adolescents in  
21 health facilities [Internet]. Geneva: World Health Organization. 2018 [cited 2021 Oct  
22 28]. p. 118. Available from: <https://www.who.int/publications/i/item/9789241565554>  
23  
24
- 25 19. Integrated management of childhood illness: caring for newborns and children in the  
26 community. [Internet]. Geneva: World Health Organization. 2011 [cited 2021 Sep 18].  
27 Available from: <https://apps.who.int/iris/handle/10665/44398>  
28
- 29 20. Hanson CM, Mirza I, Kumapley R, Ogbuanu I, Kezaala R, Nandy R. Enhancing  
30 immunization during second year of life by reducing missed opportunities for  
31 vaccinations in 46 countries. *Vaccine* [Internet]. 2018 May 31 [cited 2021 Oct  
32 28];36(23):3260–8. Available from: <https://pubmed.ncbi.nlm.nih.gov/29731113/>  
33
- 34 21. Albaugh N, Mathew J, Choudhary R, Sitaraman S, Tomar A, Bajwa IK, et al.  
35 Determining the burden of missed opportunities for vaccination among children  
36 admitted in healthcare facilities in India: a cross-sectional study. *BMJ Open* [Internet].  
37 2021 Mar 1 [cited 2021 Aug 24];11(3):e046464. Available from:  
38 <https://bmjopen.bmj.com/content/11/3/e046464>  
39
- 40 22. Rainey JJ, Lacapère F, Danovaro-Holliday MC, Mung K, Magloire R, Kananda G, et  
41 al. Vaccination Coverage in Haiti: Results from the 2009 National Survey. *Vaccine*  
42 [Internet]. 2012;30(9):1746–51. Available from:  
43 <https://www.sciencedirect.com/science/article/pii/S0264410X11019384?via%3Dihub>  
44  
45
- 46 23. Boschi-Pinto C, Labadie G, Dilip TR, Oliphant N, Dalglish SL, Aboubaker S, et al.  
47 Global implementation survey of Integrated Management of Childhood Illness (IMCI):  
48 20 years on. *BMJ Open* [Internet]. 2018 Jul 1 [cited 2022 Mar 19];8(7):e019079.  
49 Available from: <https://bmjopen.bmj.com/content/8/7/e019079>  
50
- 51 24. Wallace AS, Willis F, Nwaze E, Dieng B, Sipilanyambe N, Daniels D, et al. Vaccine  
52 wastage in Nigeria: An assessment of wastage rates and related vaccinator knowledge,  
53 attitudes and practices. *Vaccine* [Internet]. 2017 Dec 4 [cited 2021 Feb  
54 22];35(48):6751–8. Available from: [/pmc/articles/PMC5771486/](https://pubmed.ncbi.nlm.nih.gov/29731113/)  
55
- 56 25. Wallace AS, Krey K, Hustedt J, Burnett E, Choun N, Daniels D, et al. Assessment of  
57 vaccine wastage rates, missed opportunities, and related knowledge, attitudes and  
58 practices during introduction of a second dose of measles-containing vaccine into  
59 Cambodia’s national immunization program. *Vaccine* [Internet]. 2018 Jul 16 [cited  
60

- 2021 Feb 22];36(30):4517–24. Available from: /pmc/articles/PMC6032508/
26. Gil Cuesta J, Whitehouse K, Kaba S, Nanan-N’Zeth K, Haba B, Bachy C, et al. ‘When you welcome well, you vaccinate well’: a qualitative study on improving vaccination coverage in urban settings in Conakry, Republic of Guinea. *Int Health* [Internet]. 2020 Jan 13 [cited 2021 Aug 24];00:1–8. Available from: <https://academic.oup.com/inthealth/advance-article/doi/10.1093/inthealth/ihz097/5700807>
  27. Jaca A, Mathebula L, Iweze A, Pienaar E, Wiysonge CS. A systematic review of strategies for reducing missed opportunities for vaccination. *Vaccine* [Internet]. 2018 [cited 2021 Oct 28];36(21):2921–7. Available from: <http://www.ncbi.nlm.nih.gov/pubmed/29680199>
  28. Restrepo-Méndez MC, Barros AJD, Wong KLM, Johnson HL, Pariyo G, Wehrmeister FC, et al. Missed opportunities in full immunization coverage: Findings from low- and lower-middle-income countries. *Glob Health Action* [Internet]. 2016 Dec 1 [cited 2021 Oct 28];9(1):30963. Available from: <https://www.tandfonline.com/doi/full/10.3402/gha.v9.30963>
  29. Practical guide for the design, use and promotion of home-based records in immunization programmes [Internet]. Geneva: World Health Organization. 2015 [cited 2021 Oct 28]. Available from: [https://apps.who.int/iris/bitstream/handle/10665/175905/WHO\\_IVB\\_15.05\\_eng.pdf?sequence=2&isAllowed=y](https://apps.who.int/iris/bitstream/handle/10665/175905/WHO_IVB_15.05_eng.pdf?sequence=2&isAllowed=y)
  30. 2017 Assessment Report of the Global Vaccine Action Plan. Strategic Advisory Group of Experts on Immunization. [Internet]. Geneva: World Health Organization. 2017 [cited 2021 Oct 28]. Available from: [https://www.who.int/immunization/web\\_2017\\_sage\\_gvap\\_assessment\\_report\\_en.pdf?ua=1](https://www.who.int/immunization/web_2017_sage_gvap_assessment_report_en.pdf?ua=1)
  31. Fatiregun AA, Lochlainn LN, Kaboré L, Dosumu M, Isere E, Olaoye I, et al. Missed opportunities for vaccination among children aged 0–23 months visiting health facilities in a southwest State of Nigeria, December 2019. Pakhare AP, editor. *PLoS One* [Internet]. 2021 Aug 27 [cited 2021 Sep 19];16(8):e0252798. Available from: <https://dx.plos.org/10.1371/journal.pone.0252798>
  32. Ndwandwe D, Uthman OA, Adamu AA, Sambala EZ, Wiyeh AB, Olukade T, et al. Decomposing the gap in missed opportunities for vaccination between poor and non-poor in sub-Saharan Africa: A Multicountry Analyses. *Hum Vaccin Immunother* [Internet]. 2018 [cited 2019 Oct 25];14(10):2358–64. Available from: <http://www.ncbi.nlm.nih.gov/pubmed/29688133>
  33. Olorunsaiye CZ, Langhamer MS, Wallace AS, Watkins ML. Missed opportunities and barriers for vaccination: a descriptive analysis of private and public health facilities in four African countries. *Pan Afr Med J* [Internet]. 2017 [cited 2021 Oct 28];27(Suppl 3):6. Available from: <https://pubmed.ncbi.nlm.nih.gov/29296141/>
  34. Cuesta JG, Mukembe N, Valentiner-Branth P, Stefanoff P, Lenglet A, Lenglet A. Measles Vaccination Coverage Survey in Moba, Katanga, Democratic Republic of Congo, 2013: Need to Adapt Routine and Mass Vaccination Campaigns to Reach the Unreached. *PLoS Curr* [Internet]. 2015 Feb 2 [cited 2021 Oct 28];7(ecurrents.outbreaks.8a1b00760dfd81481eb42234bd18ced3). Available from:



1  
2  
3 <https://www.ncbi.nlm.nih.gov/pmc/articles/PMC4336195/>  
4

- 5 35. Second round of the national pulse survey on continuity of essential health services  
6 during the COVID-19 pandemic: January-March 2021: interim report, 22 April 2021.  
7 [Internet]. Geneva: World Health Organization. 2021 [cited 2021 Oct 28]. Available  
8 from: <https://apps.who.int/iris/handle/10665/340937>  
9
- 10 36. COVID-19 pandemic leads to major backsliding on childhood vaccinations, new  
11 WHO, UNICEF data shows [Internet]. [cited 2022 Mar 19]. Available from:  
12 [https://www.who.int/news/item/15-07-2021-covid-19-pandemic-leads-to-major-](https://www.who.int/news/item/15-07-2021-covid-19-pandemic-leads-to-major-backsliding-on-childhood-vaccinations-new-who-unicef-data-shows)  
13 [backsliding-on-childhood-vaccinations-new-who-unicef-data-shows](https://www.who.int/news/item/15-07-2021-covid-19-pandemic-leads-to-major-backsliding-on-childhood-vaccinations-new-who-unicef-data-shows)  
14  
15  
16

17 **Figure 1. Flow chart of participants' inclusion and for determining Missed Opportunities for**  
18 **Vaccination (MOV), MSF-supported health facilities, 2011-2015.**

19 **32 children were not included due to data inconsistencies.**  
20  
21  
22

23  
24 **Figure 2. Immunization schedule to ascertain MOV**  
25

26 **BCG: Bacille Calmette-Guerin vaccine.**

27 **OPV: Oral Polio vaccine. Inactivated Polio Vaccine was not considered for MOV.**

28 **Pentavalent vaccine: Diphtheria-tetanus-pertussis-hepatitis B- Haemophilus influenza type b.**

29 **PCV: Pneumococcal conjugate vaccine. Only considered for MOV in countries where it was**  
30 **introduced.**  
31

32 **Measles containing vaccine: only one dose was considered for MOV.**

33 **Yellow Fever: it was considered for MOV only in endemic countries.**  
34  
35  
36  
37  
38  
39  
40  
41  
42  
43  
44  
45  
46  
47  
48  
49  
50  
51  
52  
53  
54  
55  
56  
57  
58  
59  
60

Figure 1. Flow chart of participants' inclusion and for determining Missed Opportunities for Vaccination (MOV), MSF-supported health facilities, 2011-2015

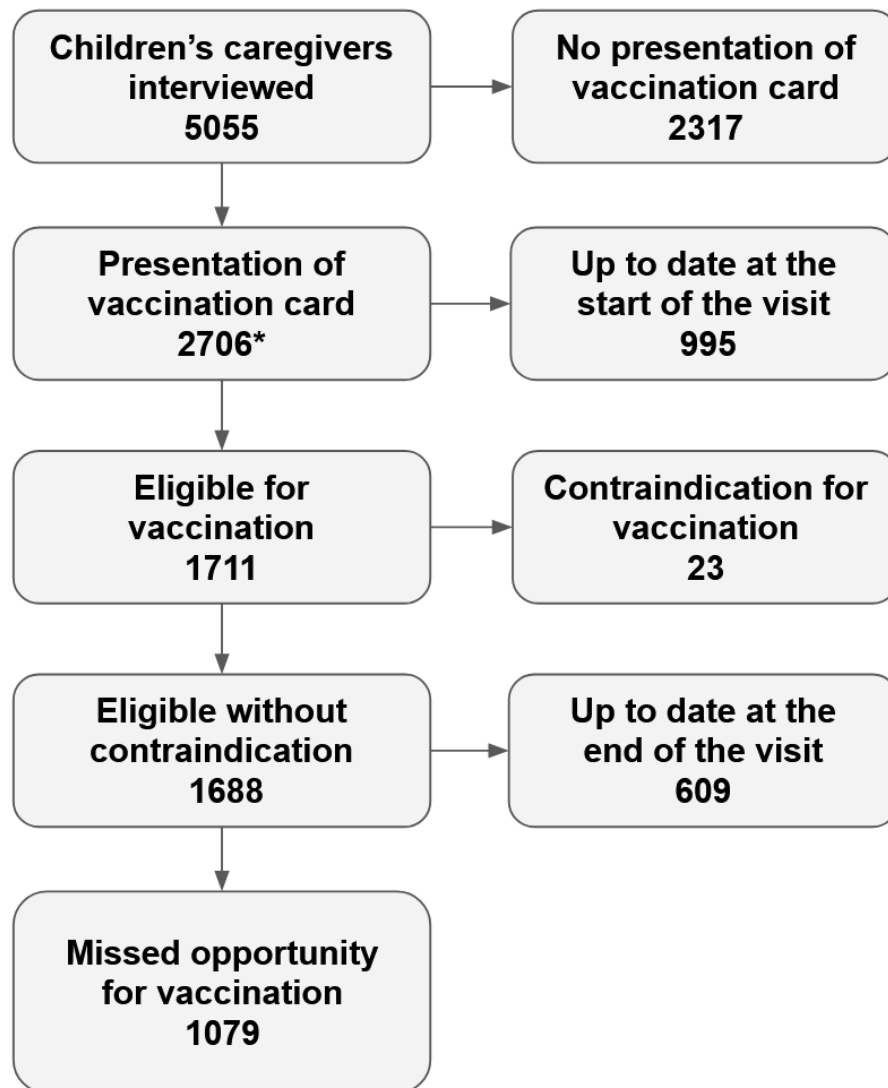

\*32 children were not included due to data inconsistencies.

**Figure 2. Immunization schedule to ascertain MOV**

| Vaccine                                                   | Recommended age                 |
|-----------------------------------------------------------|---------------------------------|
| <b>Birth dose</b>                                         |                                 |
| BCG                                                       | At birth – up to 12 months      |
| OPV                                                       | At birth – up to 2 weeks        |
| Hepatitis B vaccine                                       | At birth – up to 2 weeks        |
| <b>First dose</b>                                         |                                 |
| OPV                                                       | From 6 weeks - up to 12 months  |
| Pentavalent vaccine                                       | From 6 weeks                    |
| PCV                                                       | From 6 weeks                    |
| Rotavirus                                                 | From 6 weeks - up to 12 months  |
| Minimum interval of 4 weeks between First and Second dose |                                 |
| <b>Second dose</b>                                        |                                 |
| OPV                                                       | From 10 weeks - up to 12 months |
| Pentavalent vaccine                                       | From 10 weeks                   |
| PCV                                                       | From 10 weeks                   |
| Rotavirus                                                 | From 10 weeks - up to 12 months |
| Minimum interval of 4 weeks between Second and Third dose |                                 |
| <b>Third dose</b>                                         |                                 |
| OPV                                                       | From 14 weeks - up to 12 months |
| Pentavalent vaccine                                       | From 14 weeks                   |
| PCV                                                       | From 14 weeks                   |
| Measles-containing vaccine                                | From 9 months                   |
| Yellow Fever                                              | From 9 months                   |

BCG: Bacille Calmette-Guerin vaccine.

OPV: Oral Polio vaccine. Inactivated Polio Vaccine was not considered for MOV.

Pentavalent vaccine: Diphtheria-tetanus-pertussis-hepatitis B- Haemophilus influenza type b.

PCV: Pneumococcal conjugate vaccine. Only considered for MOV in countries where it was introduced.

Measles containing vaccine: only one dose was considered for MOV.

Yellow Fever: it was considered for MOV only in endemic countries.

**Supplementary Table 1. Characteristics of interviewed children by presentation of vaccination card. MSF-supported health facilities (2011-2015)**

|                        | Total<br>N  | Presentation of vaccination card |             |             |             | <i>p</i> value      |
|------------------------|-------------|----------------------------------|-------------|-------------|-------------|---------------------|
|                        |             | No                               |             | Yes         |             |                     |
|                        | N           | N                                | %           | N           | %           |                     |
| <b>Age groups</b>      |             |                                  |             |             |             |                     |
| <12 m                  | 2742        | 906                              | 33.0        | 1836        | 67.0        |                     |
| 12-23 m                | 1263        | 665                              | 52.7        | 598         | 47.4        |                     |
| 24-59 m                | 1050        | 746                              | 71.1        | 304         | 29.0        | <0.001 <sup>a</sup> |
| <b>Eligible</b>        |             |                                  |             |             |             |                     |
| No                     | 2276        | 1258                             | 55.3        | 1018        | 44.7        |                     |
| Yes                    | 2779        | 1059                             | 38.1        | 1720        | 61.9        | <0.001 <sup>b</sup> |
| <b>MOV<sup>c</sup></b> |             |                                  |             |             |             |                     |
| No                     | 2985        | 1358                             | 45.5        | 1627        | 54.5        |                     |
| Yes                    | 2070        | 959                              | 46.3        | 1111        | 53.7        | 0.558 <sup>b</sup>  |
| <b>Total</b>           | <b>5055</b> | <b>2317</b>                      | <b>45.8</b> | <b>2738</b> | <b>54.2</b> |                     |

% Row percentages

<sup>a</sup> Fisher exact test

<sup>b</sup> Chi square test

<sup>c</sup> MOV over the eligible children without contraindication for vaccination

**Supplementary Table 2. Characteristics of children with MOV irrespective of the possession of vaccination card. MSF-supported health facilities (2011-2015)**

|                   | MOV <sup>a</sup> |             |             |             | <i>p</i> value     |
|-------------------|------------------|-------------|-------------|-------------|--------------------|
|                   | No               |             | Yes         |             |                    |
|                   | N                | %           | N           | %           |                    |
| <b>Age groups</b> |                  |             |             |             |                    |
| <12 m             | 588              | 33.2        | 1182        | 66.8        |                    |
| 12-23 m           | 66               | 11.6        | 504         | 88.4        |                    |
| 24-59 m           | 55               | 12.5        | 384         | 87.5        | 0.001 <sup>b</sup> |
| <b>Total</b>      | <b>709</b>       | <b>25.5</b> | <b>2070</b> | <b>74.5</b> |                    |

<sup>a</sup> MOV over the eligible children without contraindication for vaccination

<sup>b</sup> Fisher exact test

**Supplementary Table 3. Children who visited MSF-supported health facilities by country (2011-2015)**

| Country                          | Children with vaccination card |                | Eligible with no contraindication |                | MOV  |                |
|----------------------------------|--------------------------------|----------------|-----------------------------------|----------------|------|----------------|
|                                  | n                              | % <sup>a</sup> | n                                 | % <sup>b</sup> | n    | % <sup>c</sup> |
| Afghanistan                      | 33                             | 1.2            | 11                                | 33.3           | 8    | 72.7           |
| Democratic Republic of the Congo | 79                             | 2.9            | 41                                | 51.9           | 26   | 63.4           |
| Mauritania                       | 244                            | 9.0            | 158                               | 64.8           | 118  | 74.7           |
| Niger                            | 1888                           | 69.8           | 1073                              | 56.8           | 851  | 79.3           |
| Pakistan                         | 15                             | 0.6            | 8                                 | 53.3           | 1    | 12.5           |
| South Sudan                      | 447                            | 16.5           | 397                               | 88.8           | 75   | 18.9           |
| Total                            | 2706                           | 100.0          | 1688                              | 62.4           | 1079 | 63.9           |

<sup>a</sup> Column percentage

<sup>b</sup> Row percentage among children with vaccination card

<sup>c</sup> Row percentage among eligible children without contraindication

**Evaluation of missed vaccination opportunities: child questionnaire**

District: ..... Team: ..... N° child:

Center: ..... Date: ..... / ..... / ..... Age of the child: ..... years ..... months

1) Do you have a vaccination card or a health book for the child?

No  Yes → Did you bring it today?  No  Yes

2) What was the main purpose of your visit to the health center today? (One answer only)

- |                                                |                                          |
|------------------------------------------------|------------------------------------------|
| <input type="checkbox"/> Curative consultation | <input type="checkbox"/> Vaccination     |
| <input type="checkbox"/> MCH consultation      | <input type="checkbox"/> Feeding program |
| <input type="checkbox"/> Accompanying an adult | <input type="checkbox"/> Other: .....    |

3) Vaccination status:

Write the **dates** (dd/mm/yy) mentioned in the health book **and circle it** if vaccine given today. If the history of vaccination is only confirmed orally by the caretaker, write **H**. **Cross** the box (X) for the missing dose of vaccine that could have been given today.

|                  | Dose 0 | Dose 1 | Dose 2 | Dose 3 |
|------------------|--------|--------|--------|--------|
| BCG              | X      |        | X      | X      |
| HepB birth dose  |        | X      | X      | X      |
| Polio            |        |        |        |        |
| DTP - HepB - Hib | X      |        |        |        |
| PCV 13           | X      |        |        |        |
| Rota             | X      |        |        | X      |
| Measles          | X      |        |        | X      |
| Yellow fever     | X      |        | X      | X      |

4) Was the child eligible for a vaccine today?

No → Do you know the date of your next vaccination?  No  Yes → **END**

Yes → Did the child present with a true contra-indication to the vaccination today?  
 No  Yes → **GO TO QUESTION 6**

5) Did the child receive all vaccines required today?

Yes  
 (If X in box)  No → Would you have accepted the vaccination today if proposed?  
 Yes  No → Why? .....

→ Reason(s) for not receiving all vaccines today? (One answer only)

- |                                                |                                                 |
|------------------------------------------------|-------------------------------------------------|
| <input type="checkbox"/> Out of stock          | <input type="checkbox"/> No vaccinator          |
| <input type="checkbox"/> Waiting time too long | <input type="checkbox"/> Not enough information |
| <input type="checkbox"/> Don't know the reason | <input type="checkbox"/> Other: .....           |

6) Did you get an appointment for your next vaccination?  No  Yes

**THANK YOU FOR YOUR PARTICIPATION!**

1  
2  
3  
4  
5  
6  
7  
8  
9  
10  
11  
12  
13  
14  
15  
16  
17  
18  
19  
20  
21  
22  
23  
24  
25  
26  
27  
28  
29  
30  
31  
32  
33  
34  
35  
36  
37  
38  
39  
40  
41  
42  
43  
44  
45  
46  
47  
48  
49  
50  
51  
52  
53  
54  
55  
56  
57  
58  
59  
60STROBE Statement—Checklist of items that should be included in reports of *cross-sectional studies*

|                              | Item No | Recommendation                                                                                                                                                                                               | Page No |
|------------------------------|---------|--------------------------------------------------------------------------------------------------------------------------------------------------------------------------------------------------------------|---------|
| <b>Title and abstract</b>    | 1       | (a) Indicate the study's design with a commonly used term in the title or the abstract                                                                                                                       | 2       |
|                              |         | (b) Provide in the abstract an informative and balanced summary of what was done and what was found                                                                                                          | 2       |
| <b>Introduction</b>          |         |                                                                                                                                                                                                              |         |
| Background/rationale         | 2       | Explain the scientific background and rationale for the investigation being reported                                                                                                                         | 4       |
| Objectives                   | 3       | State specific objectives, including any prespecified hypotheses                                                                                                                                             | 4       |
| <b>Methods</b>               |         |                                                                                                                                                                                                              |         |
| Study design                 | 4       | Present key elements of study design early in the paper                                                                                                                                                      | 5       |
| Setting                      | 5       | Describe the setting, locations, and relevant dates, including periods of recruitment, exposure, follow-up, and data collection                                                                              | 5       |
| Participants                 | 6       | (a) Give the eligibility criteria, and the sources and methods of selection of participants                                                                                                                  | 5       |
| Variables                    | 7       | Clearly define all outcomes, exposures, predictors, potential confounders, and effect modifiers. Give diagnostic criteria, if applicable                                                                     | 5-7     |
| Data sources/<br>measurement | 8*      | For each variable of interest, give sources of data and details of methods of assessment (measurement). Describe comparability of assessment methods if there is more than one group                         | 5-7     |
| Bias                         | 9       | Describe any efforts to address potential sources of bias                                                                                                                                                    | 6-7     |
| Study size                   | 10      | Explain how the study size was arrived at                                                                                                                                                                    | NA      |
| Quantitative variables       | 11      | Explain how quantitative variables were handled in the analyses. If applicable, describe which groupings were chosen and why                                                                                 | 6-7     |
| Statistical methods          | 12      | (a) Describe all statistical methods, including those used to control for confounding                                                                                                                        | 7       |
|                              |         | (b) Describe any methods used to examine subgroups and interactions                                                                                                                                          | 7       |
|                              |         | (c) Explain how missing data were addressed                                                                                                                                                                  | 6       |
|                              |         | (d) If applicable, describe analytical methods taking account of sampling strategy                                                                                                                           | NA      |
|                              |         | (e) Describe any sensitivity analyses                                                                                                                                                                        | NA      |
| <b>Results</b>               |         |                                                                                                                                                                                                              |         |
| Participants                 | 13*     | (a) Report numbers of individuals at each stage of study—eg numbers potentially eligible, examined for eligibility, confirmed eligible, included in the study, completing follow-up, and analysed            | 8       |
|                              |         | (b) Give reasons for non-participation at each stage                                                                                                                                                         | 8       |
|                              |         | (c) Consider use of a flow diagram                                                                                                                                                                           | 6       |
| Descriptive data             | 14*     | (a) Give characteristics of study participants (eg demographic, clinical, social) and information on exposures and potential confounders                                                                     | 8       |
|                              |         | (b) Indicate number of participants with missing data for each variable of interest                                                                                                                          | NA      |
| Outcome data                 | 15*     | Report numbers of outcome events or summary measures                                                                                                                                                         | 8       |
| Main results                 | 16      | (a) Give unadjusted estimates and, if applicable, confounder-adjusted estimates and their precision (eg, 95% confidence interval). Make clear which confounders were adjusted for and why they were included | 9-10    |

|                          |    |                                                                                                                                                                            |    |
|--------------------------|----|----------------------------------------------------------------------------------------------------------------------------------------------------------------------------|----|
|                          |    | (b) Report category boundaries when continuous variables were categorized                                                                                                  | 10 |
|                          |    | (c) If relevant, consider translating estimates of relative risk into absolute risk for a meaningful time period                                                           | NA |
| Other analyses           | 17 | Report other analyses done—eg analyses of subgroups and interactions, and sensitivity analyses                                                                             | NA |
| <b>Discussion</b>        |    |                                                                                                                                                                            |    |
| Key results              | 18 | Summarise key results with reference to study objectives                                                                                                                   | 11 |
| Limitations              | 19 | Discuss limitations of the study, taking into account sources of potential bias or imprecision. Discuss both direction and magnitude of any potential bias                 | 14 |
| Interpretation           | 20 | Give a cautious overall interpretation of results considering objectives, limitations, multiplicity of analyses, results from similar studies, and other relevant evidence | 14 |
| Generalisability         | 21 | Discuss the generalisability (external validity) of the study results                                                                                                      | NA |
| <b>Other information</b> |    |                                                                                                                                                                            |    |
| Funding                  | 22 | Give the source of funding and the role of the funders for the present study and, if applicable, for the original study on which the present article is based              | 16 |

\*Give information separately for exposed and unexposed groups.

**Note:** An Explanation and Elaboration article discusses each checklist item and gives methodological background and published examples of transparent reporting. The STROBE checklist is best used in conjunction with this article (freely available on the Web sites of PLoS Medicine at <http://www.plosmedicine.org/>, Annals of Internal Medicine at <http://www.annals.org/>, and Epidemiology at <http://www.epidem.com/>). Information on the STROBE Initiative is available at [www.strobe-statement.org](http://www.strobe-statement.org).



# BMJ Open

## Missed Opportunities for Vaccination (MOV) in children up to 5 years old in 19 Médecins Sans Frontières-supported health facilities: a cross-sectional survey in six low resource countries.

|                                 |                                                                                                                                                                                                                                                                                                                                                                                                                                                                                                                                                     |
|---------------------------------|-----------------------------------------------------------------------------------------------------------------------------------------------------------------------------------------------------------------------------------------------------------------------------------------------------------------------------------------------------------------------------------------------------------------------------------------------------------------------------------------------------------------------------------------------------|
| Journal:                        | <i>BMJ Open</i>                                                                                                                                                                                                                                                                                                                                                                                                                                                                                                                                     |
| Manuscript ID                   | bmjopen-2021-059900.R2                                                                                                                                                                                                                                                                                                                                                                                                                                                                                                                              |
| Article Type:                   | Original research                                                                                                                                                                                                                                                                                                                                                                                                                                                                                                                                   |
| Date Submitted by the Author:   | 15-Jun-2022                                                                                                                                                                                                                                                                                                                                                                                                                                                                                                                                         |
| Complete List of Authors:       | Borras-Bermejo, Blanca; Preventive Medicine and Epidemiology Department, Vall d'Hebron Institut de Recerca (VHIR), Vall d'Hebron Hospital Universitari, Barcelona, Spain<br>Panunzi, Isabella; Medical Department, Operational Centre Brussels, Médecins Sans Frontières, Brussels, Belgium<br>Bachy, Catherine; Medical Department, Operational Centre Brussels, Médecins Sans Frontières, Brussels, Belgium<br>Gil-Cuesta, Julita; Luxembourg Operational Research Unit, Operational Centre Brussels, Médecins Sans Frontières, Brussels, Belgium |
| <b>Primary Subject Heading</b>: | Health policy                                                                                                                                                                                                                                                                                                                                                                                                                                                                                                                                       |
| Secondary Subject Heading:      | Epidemiology, Public health, Infectious diseases                                                                                                                                                                                                                                                                                                                                                                                                                                                                                                    |
| Keywords:                       | Public health < INFECTIOUS DISEASES, Epidemiology < INFECTIOUS DISEASES, Organisation of health services < HEALTH SERVICES ADMINISTRATION & MANAGEMENT, Paediatric infectious disease & immunisation < PAEDIATRICS, Community child health < PAEDIATRICS                                                                                                                                                                                                                                                                                            |
|                                 |                                                                                                                                                                                                                                                                                                                                                                                                                                                                                                                                                     |

SCHOLARONE™  
Manuscripts



I, the Submitting Author has the right to grant and does grant on behalf of all authors of the Work (as defined in the below author licence), an exclusive licence and/or a non-exclusive licence for contributions from authors who are: i) UK Crown employees; ii) where BMJ has agreed a CC-BY licence shall apply, and/or iii) in accordance with the terms applicable for US Federal Government officers or employees acting as part of their official duties; on a worldwide, perpetual, irrevocable, royalty-free basis to BMJ Publishing Group Ltd ("BMJ") its licensees and where the relevant Journal is co-owned by BMJ to the co-owners of the Journal, to publish the Work in this journal and any other BMJ products and to exploit all rights, as set out in our [licence](#).

The Submitting Author accepts and understands that any supply made under these terms is made by BMJ to the Submitting Author unless you are acting as an employee on behalf of your employer or a postgraduate student of an affiliated institution which is paying any applicable article publishing charge ("APC") for Open Access articles. Where the Submitting Author wishes to make the Work available on an Open Access basis (and intends to pay the relevant APC), the terms of reuse of such Open Access shall be governed by a Creative Commons licence – details of these licences and which [Creative Commons](#) licence will apply to this Work are set out in our licence referred to above.

Other than as permitted in any relevant BMJ Author's Self Archiving Policies, I confirm this Work has not been accepted for publication elsewhere, is not being considered for publication elsewhere and does not duplicate material already published. I confirm all authors consent to publication of this Work and authorise the granting of this licence.

## Title Page

**Title: Missed Opportunities for Vaccination (MOV) in children up to 5 years old in 19 Médecins Sans Frontières-supported health facilities: a cross-sectional survey in six low resource countries.**

**Running Title:** MOV in MSF supported health facilities

**Key words:** vaccine, vaccination, children, immunization program, health policy, process assessment, survey, low-income countries, Expanded Program of Immunization, missed opportunities, MOV, catch-up

## Authors

Blanca Borrás-Bermejo<sup>1</sup>, Isabella Panunzi<sup>2\*</sup>, Catherine Bachy<sup>2\*</sup>, Julita Gil-Cuesta<sup>2,3</sup>

## Affiliations

<sup>1</sup> Preventive Medicine and Epidemiology Department, Vall d'Hebron Institut de Recerca (VHIR), Vall d'Hebron Hospital Universitari, Barcelona, Spain

<sup>2</sup> Medical Department, Operational Centre Brussels, Médecins Sans Frontières, Brussels, Belgium

<sup>3</sup> Luxembourg Operational Research Unit, Operational Centre Brussels, Médecins Sans Frontières, Brussels, Belgium

\* These authors contributed equally

## Corresponding author:

Blanca Borrás-Bermejo, MD, MPH  
Preventive Medicine and Epidemiology Department, Hospital Universitari Vall d'Hebron  
Passeig Vall d'Hebron 119-129, 08035 Barcelona, Spain  
Phone: +34 93 489 42 10  
[bborras@vhebron.net](mailto:bborras@vhebron.net)

1  
2  
3 **Title: Missed Opportunities for Vaccination (MOV) in children up to 5 years old in 19**  
4 **Médecins Sans Frontières-supported health facilities: a cross-sectional survey in six low**  
5 **resource countries.**  
6  
7

8  
9 **Abstract**

10  
11 **Objective**

12  
13 To describe Missed Opportunities for Vaccination (MOV) among children visiting MSF-  
14 supported facilities, their related factors, and to identify reasons for non-vaccination.  
15  
16

17  
18 **Design:** Cross-sectional surveys conducted between 2011 and 2015.  
19

20  
21 **Setting and participants:** children up to 59 months of age visiting 19 MSF-supported  
22 facilities (15 primary health care centers and 4 hospitals) in Afghanistan, Democratic  
23 Republic of the Congo, Mauritania, Niger, Pakistan and South Sudan. Only children whose  
24 caregivers presented their vaccination card were included.  
25  
26

27  
28 **Outcome measures:** We describe MOV prevalence and reasons for no vaccination. We also  
29 assess the association of MOV with age, type of facility and reason for visit.  
30  
31

32  
33 **Results:** Among 5055 children's caregivers interviewed, 2738 presented a vaccination card of  
34 whom 62.8% were eligible for vaccination and of those, 64.6% had a MOV. Presence of  
35 MOV was more likely in children visiting a hospital or a health facility for a reason other than  
36 vaccination. MOV occurrence was significantly higher among children aged 12-23 months  
37 (84.4%) and 24-59 months (88.3%) compared with children below 12 months (56.2%,  
38  $p \leq 0.001$ ). Main reasons reported by caregivers for MOV were lack of vaccines (40.3%),  
39 reason unknown (31.2%), and not being informed (17.6%).  
40  
41  
42  
43

44  
45 **Conclusions**

46  
47 Avoiding MOV should remain a priority in low-resource settings, in line with the new  
48 "Immunization Agenda 2030". Children beyond their second year of life are particularly  
49 vulnerable for MOV. We strongly recommend assessment of eligibility for vaccination as  
50 routine health care practice regardless of the reason for the visit by screening vaccination  
51 card. Strengthening implementation of "Second year of life" visits and catch-up activities are  
52 proposed strategies to reduce MOV.  
53  
54  
55  
56  
57  
58  
59  
60

### Strengths and limitations of this study

- The major strength of the study is that only children with a valid vaccination card were included, so not relying on self-reported data helped to avoid potential recall bias
- Differences by gender on Missed Opportunities for Vaccination were not explored
- Reasons related with Missed Opportunities for Vaccination were limited to those included at the questionnaire and declared by caregivers.

For peer review only

## 1 INTRODUCTION

2 Since 1983, the Expanded Program of Immunization (EPI) has recommended using every  
3 health care visit as an opportunity to immunize each eligible child, regardless of the reason for  
4 consultation. A Missed Opportunity for Vaccination (MOV) occurs when a child eligible for  
5 vaccination (without contraindication) remains unvaccinated or partially vaccinated (not up-  
6 to-date) at the end of the visit, so the consultation does not result in the children receiving all  
7 the vaccine doses for which he or she was eligible. Among the causes for under-vaccination in  
8 low and middle-income countries, 44% are for reasons related to health systems, including  
9 MOV and lack of access to health care (1). In 1993, the first systematic review including 45  
10 countries found a median MOV prevalence of 67% (2), and despite increases in routine  
11 vaccination coverage since then, MOV remain as high as 32% in the last systematic review  
12 performed in 2014 (3). Since then, the World Health Organization (WHO) has promoted the  
13 use of MOV assessments to measure the performance of health services in vaccination (4)(5).  
14 In order to improve immunization coverage, in 2017 WHO recommended a revised  
15 methodology to assess MOV, targeting children aged 0-23 months (6). However, data is  
16 scarce on MOV prevalence in children above 23 months of age (3). Through its medical  
17 humanitarian programs in low and middle-income countries, Médecins Sans Frontières (MSF)  
18 strengthens routine vaccination services regardless the age of the child, following WHO  
19 recommendations (7), in order to reduce the number of under and unvaccinated children.  
20 Therefore, we took the opportunity to systematically assess MOV in children up to five years  
21 of age within MSF programs.

22 Our objective was to describe MOV prevalence and its characteristics, and to identify reasons  
23 for non-vaccination among children up to five years of age visiting MSF-supported health  
24 facilities in six different countries.

## 25 **METHODS**

### 26 **Study design and settings**

27 A cross-sectional exit survey of caregivers was performed in 19 health facilities. They  
28 included four hospitals and 15 primary health care centers (PHCC) between 2011 and 2015 in  
29 six countries: Afghanistan, Democratic Republic of the Congo, Mauritania, Niger, Pakistan  
30 and South Sudan. Countries, health facilities and time of the assessments were chosen on a  
31 convenient basis following operational reasons. Facilities included were chosen because MSF  
32 was already supporting routine vaccination and where MOV training to local staff was  
33 feasible in those health facilities.

### 34 **Patient and Public Involvement**

35 Patients or the public were not involved in the design, conduct, reporting or dissemination  
36 plans of our research.

### 37 **Study population and participant selection**

38 The study population consisted of children up to five years of age accompanied by a  
39 caregiver, visiting an MSF-supported facility. A convenience sample of all caregivers  
40 accompanying a child under five years of age was approached on the day of the survey at each  
41 facility. Caregivers were invited to participate when exiting the facility, regardless of the  
42 reason for their visit, and those who provided oral consent were interviewed. If several  
43 children were present with one caregiver, all were included. Children whose caregivers could  
44 not present a vaccination card were excluded from the analysis.

### 45 **Data collection**

46 MSF developed a standardized methodology to assess MOV based on the 1988 WHO tool  
47 (8). Interviews were conducted in local languages. In preparation for the survey, surveyors

1  
2  
3 48 locally recruited received two days of training focusing on conducting the interview and  
4  
5 49 identifying eligible children for vaccination according to national vaccination schedules, age  
6  
7 50 of the child and minimum interval between doses.  
8  
9

10 51 A structured questionnaire was created (Annex 1) and used in all assessments. Information  
11  
12 52 on type of facility (hospital or PHCC), age of the child, presentation of a vaccination card,  
13  
14 53 reason for visiting the facility and vaccination history were collected, as well as whether there  
15  
16 54 was a contraindication for vaccination. We considered as contraindications, fever above 38,5  
17  
18 55 °C and a severe allergic reaction to a previous dose of DTP-containing or measles-containing  
19  
20 56 vaccines. For those who had not received any of the recommended vaccines during the visit,  
21  
22 57 surveyors asked for reasons why the child was not vaccinated, whether caregivers accepted  
23  
24 58 receiving the missing vaccines doses, and about their awareness of the next vaccination  
25  
26 59 appointment.  
27  
28  
29  
30  
31

32 60 We classified children as having a MOV as per standard WHO's definition (6): a MOV  
33  
34 61 occurs when a child eligible for vaccination (without contraindication) remains unvaccinated  
35  
36 62 or partially vaccinated (not up to date) at the end of any visit to a health facility (Figure 1).  
37  
38

39 63 Surveyors determined if the child was eligible that day of the assessment for at least one  
40  
41 64 vaccine dose according to age and National immunization schedules (Figure 2), and whether  
42  
43 65 the child had received all the recommended vaccines during that visit. Most of National  
44  
45 66 immunization programs allowed vaccination until 12 months of age by the time of the  
46  
47 67 assessments. Nevertheless, MSF supported vaccination of children up to 5 years of age in  
48  
49 68 each of these facilities. In our study, surveyors considered a MOV if a child did not receive  
50  
51 69 the indicated vaccines even if they were above the recommended age to receive them  
52  
53 70 according to the country policy, to the exception of BCG and Rotavirus (Figure 2). Only  
54  
55  
56  
57  
58  
59  
60



1  
2  
3 71 widely introduced vaccines in each country were considered to ascertain MOV. Year of  
4  
5 72 vaccine introduction in each country can be consulted here (9).  
6  
7

8 73 For those having a MOV, surveyors asked for reasons why the child was not vaccinated,  
9  
10 74 whether caregivers would have accepted receiving the missing vaccines doses, and about their  
11  
12  
13 75 awareness of the next vaccination appointment.  
14  
15

## 16 76 **Data analysis**

17  
18  
19 77 We calculated the prevalence of MOV among children eligible for a vaccination, excluding  
20  
21 78 those with a reported contraindication. Among children with a MOV we calculated the  
22  
23 79 proportion of caregivers who would have accepted vaccination if it had been proposed on the  
24  
25  
26 80 day of the visit and the proportion of caregivers who knew their date of next vaccination  
27  
28 81 appointment.  
29  
30

31 82 Proportions were used to describe the children and to estimate MOV. Significant differences  
32  
33 83 in the distribution were assessed using the Pearson's two-sided Chi-square test or Fisher exact  
34  
35  
36 84 test. For the bivariate analysis, age was categorized as below and above 12 months of age as  
37  
38 85 this was the main target of the National program schedules in countries included at the time  
39  
40  
41 86 the survey was performed. Reasons for visit to the facility were grouped into either  
42  
43 87 vaccination or others. We assessed the association of MOV with age, type of facility and  
44  
45 88 reason for visit by calculating Odds Ratios. A logistic regression model was adjusted for age  
46  
47 89 (0-11,12-59 months), type of facility (hospital, PHCC), and reason for visit (vaccination,  
48  
49 90 other reason). The level of statistical significance was set at  $p < 0.05$ .

50  
51  
52 91 In each facility, data entry officers inputted the paper questionnaire data into an Excel  
53  
54 92 database, which was validated by two of the study investigators (10). The analysis was  
55  
56  
57 93 performed using STATA (version 16, College Station, Texas).  
58

## 59 94 **Ethics issues**

60

1  
2  
3 95 Prior to each evaluation, authorization from the local health authorities and from the director  
4  
5 96 of each health facility was obtained. Oral consent was received from each caregiver. During  
6  
7 97 the survey, children identified with MOV were sent back to the vaccination unit to receive the  
8  
9 98 missing vaccine(s) if the caregiver agreed and if there was no shortage. All data from the  
10  
11 99 questionnaires were anonymous and entered into a dedicated password-protected electronic  
12  
13 100 database. This research fulfilled the exemption criteria by Médecins sans Frontières Ethics  
14  
15 101 Review Board (MSF ERB) for a posteriori analysis of routinely collected clinical data and  
16  
17 102 thus did not require MSF ERB review. It was conducted with permission from the Medical  
18  
19 103 Director, Operational Centre Brussels Médecins sans Frontières.

## 104 **RESULTS**

105 From 2011 to 2015, the caregivers of 5055 children were interviewed in 19 facilities (four  
106 hospitals and 15 PHCCs). We report the results for the 2706 (53.5%) children who presented  
107 their vaccination card on the day of the survey: 33 from Afghanistan, 79 from Democratic  
108 Republic of the Congo, 244 from Mauritania, 1888 from Niger, 15 from Pakistan and 447  
109 from South Sudan. Characteristics of children not presenting vaccination cards can be  
110 consulted at Supplementary table 1.

### 111 **Characteristics of the study population**

112 Among the 2706 children included, 995 (36.7%) were already up to date before the visit, and  
113 1711 (63.2%) were eligible for vaccination. Twenty-three caregivers (1.3%) reported a  
114 contraindication (Figure 1). Among eligible children, 609 (36.1%) were vaccinated during the  
115 visit, whereas 1079 (63.9%) experienced a MOV during their health facility visit.

116 Children's baseline characteristics are presented in Table 1. Their mean age was 10.1 months  
117 (Standard Deviation - 9). The majority (2213, 81.8%) were interviewed at exit of a PHCC.  
118 Reasons for visiting the health facility were distributed among curative consultation (31%),

1  
2  
3 119 followed by unspecified reason (26%), vaccination (16%), nutrition (16%), mother and child  
4  
5 120 health visit (10%) and accompanying an adult (1%).  
6  
7

### 8 121 **Characteristics of children with MOV**

9  
10  
11 122 Most children who were eligible for vaccination and consulting for a reason other than  
12  
13 123 vaccination, had a MOV (n=960, 71.9%), while a third of the children coming to the facility  
14  
15 124 for vaccination also had a MOV (n=119, 33.7%). More than 80% of children aged 12-23  
16  
17 125 months (265/314) and almost 90% of children aged 23-59 (151/171) had a MOV, compared  
18  
19 126 to 55% of children below 12 months (663/1203). MOV occurrence was significantly more  
20  
21 127 likely among older children than younger ones (Table 1). Differences in MOV by country can  
22  
23 128 be consulted at Supplementary table 2.  
24  
25

26  
27  
28 129 Only four caregivers of children with MOV would have refused vaccination if it had been  
29  
30 130 proposed during the visit. About one fifth (21%) of caregivers of children with MOV were  
31  
32 131 aware of the date of the next vaccination appointment.  
33  
34  
35

36 132 The commonest reason declared for having a MOV was lack of vaccines (40.1%), followed  
37  
38 133 by reason unknown (32%), not being informed (17.3%), lack of staff (3.3%), waiting time too  
39  
40 134 long (1.7%) and other unclassified reasons (5.6%).  
41  
42  
43

### 44 135 **Factors related with presence of MOV**

45  
46 136 Children above 12 months of age and those accessing the health facility for a reason other  
47  
48 137 than vaccination, had an almost five times higher risk of having a MOV (Table 2), compared  
49  
50 138 to children below 12 months of age and those visiting for vaccination. Children visiting a  
51  
52 139 hospital had a 2.7 times higher risk of having a MOV compared to children visiting a PHCC.  
53  
54 140 After adjusting by type of facility and reason for visit, children above 12 months still had a  
55  
56 141 significantly higher risk of having a MOV (adjusted OR: 1.7, 95% CI 1.1-2.5).  
57  
58  
59  
60 142

**Table 1. Characteristics of children who visited MSF-supported health facilities and the presence of Missed Opportunities for Vaccination (MOV), 2011-2015**

|                            | Total children<br>n=2706<br>n (%) | Eligible for<br>vaccination <sup>a</sup><br>n=1688<br>n (%) <sup>b</sup> | MOV                      |                           | p value             |
|----------------------------|-----------------------------------|--------------------------------------------------------------------------|--------------------------|---------------------------|---------------------|
|                            |                                   |                                                                          | No<br>n (%) <sup>c</sup> | Yes<br>n (%) <sup>c</sup> |                     |
| <b>Age groups</b>          |                                   |                                                                          |                          |                           |                     |
| <12 m                      | 1805 (66.7)                       | 1203 (66.5)                                                              | 540 (44.9)               | 663 (55.1)                | <0,001 <sup>e</sup> |
| 12-23 m                    | 597 (22.1)                        | 314 (52.6)                                                               | 49 (15.6)                | 265 (84.4)                |                     |
| 24-59 m                    | 304 (11.2)                        | 171 (56.3)                                                               | 20 (11.7)                | 151 (88.3)                |                     |
| <b>Facility type</b>       |                                   |                                                                          |                          |                           |                     |
| Hospital                   | 493 (18.2)                        | 336 (68.2)                                                               | 67 (20)                  | 269 (80.1)                | <0,001 <sup>e</sup> |
| PHCC <sup>d</sup>          | 2213 (81.8)                       | 1352 (61.1)                                                              | 542 (40.1)               | 810 (59.9)                |                     |
| <b>Reason of the visit</b> |                                   |                                                                          |                          |                           |                     |
| Curative                   | 831 (30.7)                        | 513 (61.7)                                                               | 40 (7.8)                 | 473 (92.2)                | <0,001 <sup>f</sup> |
| Other                      | 706 (26.1)                        | 311 (44.1)                                                               | 281 (90.4)               | 30 (9.7)                  |                     |
| Vaccination                | 436 (16.1)                        | 353 (81.0)                                                               | 234 (64.3)               | 119 (33.7)                |                     |
| Nutrition                  | 430 (15.9)                        | 275 (64.0)                                                               | 23 (8.4)                 | 252 (91.6)                |                     |
| Mother Child Health visit  | 265 (9.8)                         | 214 (80.8)                                                               | 29 (13.6)                | 185 (86.5)                |                     |
| Accompanying               | 38 (1.4)                          | 22 (57.9)                                                                | 2 (9.0)                  | 20 (90.9)                 |                     |

<sup>a</sup> Without contraindication for vaccination

<sup>b</sup> Row percentage over the total children

<sup>c</sup> Row percentage over the eligible children without contraindication for vaccination

<sup>d</sup> PHCC: Primary Health Care Center

<sup>e</sup> Chi square test

<sup>f</sup> Fisher exact test

**Table 2. Factors related to Missed Opportunities for Vaccination (MOV) in eligible children who visited MSF-supported health facilities, 2011-2015**

|                            | MOV<br>children<br>n= 1079<br>n (%) | Odds Ratio<br>(95%CI) | Adjusted Odds<br>Ratio<br>(95%CI) |
|----------------------------|-------------------------------------|-----------------------|-----------------------------------|
| <b>Age in months</b>       |                                     |                       |                                   |
| 0-11 m                     | 663 (55.1)                          |                       |                                   |
| 12-59 m                    | 416 (85.8)                          | 4.91 (3.67-6.57)      | 3.79 (2.84-5.07)                  |
| <b>Reason for visiting</b> |                                     |                       |                                   |
| Vaccination                | 119 (33.7)                          |                       |                                   |
| Other                      | 960 (89.0)                          | 5.03 (3.86-6.56)      | 3.52 (2.70-4.58)                  |
| <b>Facility type</b>       |                                     |                       |                                   |
| PHCC <sup>a</sup>          | 810 (59.9)                          |                       |                                   |
| Hospital                   | 269 (80.1)                          | 2.69 (2.00-3.60)      | 2.75 (2.02-3.73)                  |

<sup>a</sup> PHCC: Primary Health Care Center

Odds ratio adjusted for age, reason for visiting, facility type (two categories each)

## 157 **DISCUSSION**

158 This study summarizes the MSF experience and lessons learned assessing MOV from 2011 to  
159 2015 in six low-income countries. To our knowledge, this is one of the few studies that  
160 assessed MOV in children beyond 23 months of age. Our results highlight that, despite MSF's  
161 efforts, most children had a MOV after visiting one of the facilities. Even among those  
162 children who specifically visited for vaccination, one third still missed at least one dose of a  
163 vaccine for which they were eligible during the visit. The proportion of children with MOV  
164 increased with age, with children above one year of age being at higher risk.

165 MOV prevalence in our study (64%) was higher than the last systematic review conducted in  
166 low income countries in 2014, which found a prevalence of 32% (26.8–37.7) (3). An  
167 explanation could be that the majority of studies in this meta-analysis only included children  
168 below two years of age resulting in a lower estimation of MOV. As our data show, MOV was  
169 nearly 90% in children above 23 months of age. One of the few studies to include older  
170 children also reported that MOV prevalence was higher in children aged 1-5 years (56.6%),  
171 compared to those below one year (31.4%) (11). Thus, we believe that overall MOV  
172 prevalence is being seriously underestimated, as assessments do not include children beyond  
173 the EPI age target for most vaccines, that is, above 23 months of age.

174 Consistent with recent studies in low-income countries (12), we found a higher MOV  
175 prevalence in children above 12 months. In a recent study that assessed MOV with WHO  
176 methodology in Chad and Malawi (13), Ogbuano et al. found a MOV prevalence of 86% in  
177 Chad and 94% in Malawi among children above one year of age, compared to 49% and 61%  
178 below one year, respectively.

179 Age as a risk for having MOV may be explained by older children having been perceived as  
180 “too old” to be eligible (14), as many National immunization programs only target children

1  
2  
3 181 below one year of age. Age as a false contraindication was found to be one of the main  
4  
5 182 reasons for having a MOV in a WHO review about factors related with under-vaccination  
6  
7  
8 183 (15). For example, even if 2013 WHO removed age restriction for rotavirus vaccine in the  
9  
10 184 WHO African region, nevertheless it is not implemented in many countries (16)(17). But  
11  
12 185 efforts are being made to ‘Leave No One Behind’ (18): the latest WHO update of  
13  
14 186 recommendations for routine immunization (19) emphasizes that measles vaccine should not  
15  
16  
17 187 be limited to children up to 12 months of age. In line with that, a “second year of life healthy  
18  
19 188 child visit” is already recommended by WHO (20)(7) increasing the opportunity to vaccinate  
20  
21 189 children, especially in those who might have missed vaccination in their first year of life. This  
22  
23  
24 190 strategy, together with complementary catch-up activities to continue screening children at  
25  
26 191 any contact with health services, should be strengthened in low-resource settings  
27  
28 192 (7)(21)(22)(23). We believe this ‘never too old’ policy should be adopted by all national  
29  
30 193 immunization programs in order to ensure children do not miss the opportunity to be fully  
31  
32  
33 194 vaccinated at any age.

34  
35  
36 195 Our data draw attention to the high proportion of children missing an opportunity to get  
37  
38 196 vaccinated at hospital level. A similar proportion has been found in a recent study performed  
39  
40 197 in northern Indian hospitals (24). This could be explained by vaccine shortage at hospital  
41  
42 198 level but also by the belief in the false contraindication for vaccination in a sick child among  
43  
44 199 caregivers and health care workers. For example, a study in Haiti reported that up to 13% of  
45  
46 200 reasons for under-vaccination was child illness, despite the fact that mild infections should not  
47  
48 201 prevent vaccination (25). A similar finding is highlighted in a MOV assessment in Timor  
49  
50 202 Leste (14) were Li et al. found that only 24% of health care workers were able to identify true  
51  
52 203 contraindications, and Kaboré et al. (12) reported that 83% of health workers failed to  
53  
54 204 correctly identify valid contraindications for vaccination. This could be avoided through the  
55  
56  
57  
58  
59  
60

1  
2  
3 205 proper adherence to the Integrated Management of Newborn and Childhood Illnesses  
4  
5 206 (IMNCI) guidelines (22), already in place in these countries (26).  
6  
7

8 207 We identified that one third of children actually visiting for vaccination were still not up to  
9  
10 208 date at the end of the visit despite being vaccinated with one or more doses. Similar estimates  
11  
12 209 were found in four recent MOV assessments in Timor Leste, Chad, Malawi, and Burkina Faso  
13  
14 210 (12)(13)(14). This could be explained by supply shortages of specific vaccines, but also by  
15  
16 211 health workers potentially failing to identify eligibility for certain vaccines. Failure to  
17  
18 212 administer simultaneous vaccines due to fear of wasting doses from multi-vial vaccines has  
19  
20 213 been also suggested as an explanation for remaining MOV after vaccination visits (27)(28).  
21  
22 214 Among reasons for MOV in our study, almost 20% reported not being informed by health  
23  
24 215 care workers about the eligibility of the child for vaccination. This lack of information on  
25  
26 216 vaccine eligibility has also been reported elsewhere (29). Therefore, promoting training on  
27  
28 217 eligibility assessment and true contraindications for vaccination among health care workers  
29  
30 218 could be an effective strategy to reduce MOV (30).  
31  
32  
33  
34  
35

36 219 Over three-quarters of eligible children consulting for reasons other than vaccination (mother-  
37  
38 220 and-child health visits, nutrition, curative) had a MOV. This highlights the need of  
39  
40 221 strengthening routine screening of vaccination status that must be done irrespective of reason  
41  
42 222 visit. Caregivers should be encouraged to bring the vaccination card to every contact with  
43  
44 223 health services, to facilitate and ensure that the child can be properly screened for vaccination  
45  
46 224 eligibility. So, integrating vaccination into other preventive or curative services at hospital  
47  
48 225 and at primary health care level, could facilitate a significant reduction on MOV (31)(32).  
49  
50  
51

52  
53 226 In our study, caregivers reported lack of vaccines as the main reason for MOV. This is  
54  
55 227 consistent with recent MOV assessments (13), where approximately 30% of health care  
56  
57 228 workers reported insufficient vaccine supply or logistics issues. Inadequate vaccine supply  
58  
59  
60

1  
2  
3 229 has already been pointed out as one of the main reasons for under vaccination in low income  
4  
5 230 countries (1). Ministries of Health and their partners must work to ensure adequate vaccine  
6  
7 231 supply at facility level in order be able to vaccinate any children who have accessed health  
8  
9  
10 232 care services (33).

11  
12  
13 233 This study is not from a representative sample, and very few children were eligible in two of  
14  
15 234 the six countries included (Supplementary table 2). It has three main limitations. First, gender  
16  
17 235 was not collected, losing the opportunity to uncover gender differences. Nevertheless, no  
18  
19 236 gender differences in the distribution of MOV have been reported in the latest studies (3)(13).  
20  
21 237 Second, our survey didn't allow us to explore health care providers' practices and  
22  
23 238 perceptions, identified as one of the main reasons related to MOV in the last systematic  
24  
25 239 review (3). In 2015, WHO launched a revised MOV strategy, which included Knowledge,  
26  
27 240 Attitudes and Practices (KAP) questionnaires, to better guide the implementation of  
28  
29 241 interventions to reduce MOV (13) which is generating new evidence (34). Also, we could not  
30  
31 242 explore other factors that have been previously related to MOV such as maternal education,  
32  
33 243 living in rural areas, number of children and other economic inequalities, as information on  
34  
35 244 contacted caregivers was not kept(35) and unfortunately, we do not have information to  
36  
37 245 estimate the participation rate.

38  
39  
40  
41  
42  
43 246 Third, we excluded from the analysis almost half of the children whose caregivers could not  
44  
45 247 present a vaccination card. This may mean that we underestimated MOV prevalence in our  
46  
47 248 target population, since not presenting a vaccination card has shown to be associated with  
48  
49 249 MOV (1)(3)(36). On one hand, not relying on self-reported data helped avoid potential recall  
50  
51 250 bias, which is a limitation in vaccine coverage studies in low-resource settings (37). On the  
52  
53 251 other hand, possession of vaccination card declines with age (11) (a relation also observed in  
54  
55 252 our study, Supplementary table 1); what could result in an overestimated prevalence of MOV  
56  
57  
58  
59  
60



1  
2  
3 253 in older children. Nevertheless, when assessing the relation between MOV and age including  
4  
5 254 those with and without vaccination card, we obtain similar results (Supplementary table 3).  
6  
7

8 255 Finally, as children with identified MOV were sent back for vaccination when possible, it  
9  
10 256 could have introduced a bias in MOV prevalence if these children were inadvertently  
11  
12 257 interviewed again. Also, MOV prevalence estimates may have improved over the last ten  
13  
14 258 years, as WHO has lately reinforced EPI vaccination during the second year of life.  
15  
16  
17

## 18 259 **CONCLUSIONS**

20 260 Despite progress in vaccine coverage, MOV remains an important problem in low-resource  
21  
22 261 settings. Avoiding MOV should remain a priority where access to health care is limited, in  
23  
24 262 line with the new “Immunization Agenda 2030” (18). This is particularly important  
25  
26 263 considering the negative impact COVID-19 pandemic is having on routine immunization  
27  
28 264 programs in low and middle-income countries (38)(39).  
29  
30  
31

32 265 We recommend integrating systematic vaccination screening into routine health care services,  
33  
34 266 regardless of the reason for the visit, the type of facility and the age of the child. To promote  
35  
36 267 maintaining and providing vaccination cards at every health care visit will help to reinforce  
37  
38 268 vaccination screening and better identification of eligible children.  
39  
40  
41

42 269 We identified that children above 23 months of age are particularly vulnerable for MOV.  
43  
44 270 Thus, we would recommend including children beyond 23 months of age in the current WHO  
45  
46 271 methodology for MOV assessments in order to avoid underestimation of MOV. National  
47  
48 272 immunization programs should allow administration of missing doses, regardless of the age of  
49  
50 273 the child, as the EPI has expanded its vaccination recommendations during the second year of  
51  
52 274 life and beyond.  
53  
54  
55  
56  
57  
58  
59  
60

1  
2  
3 275 Strengthening the implementation of second-year-of-life visits, as recommended by WHO,  
4  
5 276 with catch-up vaccination strategies (7) would provide additional opportunities to receive  
6  
7 277 missed vaccine doses and *leave no one behind*.

#### 278 **Data Availability Statement**

279 Questionnaire dataset is available in a public, open access repository.

#### 280 **Acknowledgements**

281 We would like to thank all caregivers for sharing their invaluable time, and all health care  
282 workers who performed the assessments. Special thanks to Ibrahim Barrie and Marie-Eve  
283 Burny for implementation of MOV studies in the field. Thanks to Tony Reid for language  
284 review and to J.A. Rodrigo for his valuable input.

#### 285 **Contributorship Statement**

286 Bachy C. and Panunzi I. designed the study and contributed to conduct it in the six countries.  
287 Bachy C., Panunzi I., Gil-Cuesta J. and Borrás-Bermejo B. carried out the data analysis.  
288 Borrás-Bermejo B. drafted the manuscript that was critically reviewed and approved by all  
289 authors.

#### 290 **Competing interests**

291 None declared

#### 292 **Funding**

293 The study was carried out by MSF staff as part of their routine activities. No extra funding  
294 was required.

#### 51 **References**

- 52  
53  
54 295 1. Rainey JJ, Watkins M, Ryman TK, Sandhu P, Bo A, Banerjee K. Reasons related to  
55 296 non-vaccination and under-vaccination of children in low and middle income countries:  
56 297 Findings from a systematic review of the published literature, 1999-2009. Vol. 29,  
57 298 Vaccine. 2011. p. 8215–21.
- 58  
59 299 2. Hutchins SS, Jansen HAFM, Robertson SE, Evans P, Kin-Farley RJ. Studies of missed  
60 300 opportunities for immunization in developing and industrialized countries. Bull World

- 1  
2  
3 301 Health Organ. 1993;71(5):549–60.  
4  
5 302 3. Sridhar S, Maleq N, Guillermet E, Colombini A, Gessner BD. A systematic literature  
6 303 review of missed opportunities for immunization in low- and middle-income countries.  
7 304 *Vaccine*. 2014 Dec 5;32(51):6870–9.  
8  
9 305 4. Methodology for the Evaluation of Missed Opportunities for Vaccination [Internet].  
10 306 Pan American Health Organization. 2014. Available from:  
11 307 [https://www.paho.org/hq/dmdocuments/2015/MissedOpportunity-Vaccination-](https://www.paho.org/hq/dmdocuments/2015/MissedOpportunity-Vaccination-Protocol-2014.pdf)  
12 308 [Protocol-2014.pdf](https://www.paho.org/hq/dmdocuments/2015/MissedOpportunity-Vaccination-Protocol-2014.pdf)  
13  
14 309 5. Velandia-González M, Trumbo SP, Díaz-Ortega JL, Bravo-Alcántara P, Danovaro-  
15 310 Holliday MC, Dietz V, et al. Lessons learned from the development of a new  
16 311 methodology to assess missed opportunities for vaccination in Latin America and the  
17 312 Caribbean. 2011 Feb 21;15(1):5.  
18  
19 313 6. Methodology for the Assessment of Missed Opportunities for Vaccination [Internet].  
20 314 Geneva: World Health Organization. 2017 [cited 2021 Feb 22]. Available from:  
21 315 <https://apps.who.int/iris/handle/10665/259201>  
22  
23 316 7. Leave no one behind: guidance for planning and implementing catch-up vaccination  
24 317 [Internet]. Geneva: World Health Organization. 2021 [cited 2022 Feb 27]. Available  
25 318 from: [https://www.who.int/publications/i/item/leave-no-one-behind-guidance-for-](https://www.who.int/publications/i/item/leave-no-one-behind-guidance-for-planning-and-implementing-catch-up-vaccination)  
26 319 [planning-and-implementing-catch-up-vaccination](https://www.who.int/publications/i/item/leave-no-one-behind-guidance-for-planning-and-implementing-catch-up-vaccination)  
27  
28 320 8. Sato PA & WEP on I. Protocole pour l'évaluation des occasions manquées de  
29 321 vaccination / Paul Sato. 1998;  
30  
31 322 9. WHO Immunization Data portal [Internet]. [cited 2022 Mar 19]. Available from:  
32 323 <https://immunizationdata.who.int/listing.html?topic=&location=>  
33  
34 324 10. [dataset]. Borrás-Bermejo B. Data from: Missed Opportunities for Vaccination in  
35 325 MSF-Supported Health Facilities. [Internet]. Open Science Framework. December 6,  
36 326 2021. Available from: <https://doi.org/10.17605/OSF.IO/SFXDK>  
37  
38 327 11. Garib Z, Vargas AL, Trumbo SP, Anthony K, Diaz-Ortega JL, Bravo-Alcántara P, et  
39 328 al. Missed Opportunities for Vaccination in the Dominican Republic: Results of an  
40 329 Operational Investigation. *Biomed Res Int*. 2016;2016:4721836.  
41  
42 330 12. Kaboré L, Meda B, Médah I, Shendale S, Nic Lochlainn L, Sanderson C, et al.  
43 331 Assessment of missed opportunities for vaccination (MOV) in Burkina Faso using the  
44 332 World Health Organization's revised MOV strategy: Findings and strategic  
45 333 considerations to improve routine childhood immunization coverage. *Vaccine*. 2020  
46 334 Nov 10;38(48):7603–11.  
47  
48 335 13. Ogbuanu IU, Li AJ, Anya BM, Tamadji M, Chirwa G, Chiwaya KW, et al. Can  
49 336 vaccination coverage be improved by reducing missed opportunities for vaccination?  
50 337 Findings from assessments in Chad and Malawi using the new WHO methodology.  
51 338 Uthman O, editor. *PLoS One*. 2019 Jan 24;14(1):e0210648.  
52  
53 339 14. Li AJ, Peiris TSR, Sanderson C, Lochlainn LN, Mausiry M, da Silva RBJBM, et al.  
54 340 Opportunities to improve vaccination coverage in a country with a fledgling health  
55 341 system: Findings from an assessment of missed opportunities for vaccination among  
56 342 health center attendees—Timor Leste, 2016. *Vaccine*. 2019 Jul 18;37(31):4281–90.  
57  
58 343 15. Epidemiology of the Unimmunized Child. Findings from the Grey Literature. Prepared  
59  
60

- 1  
2  
3 344 for the World Health Organization. October 2009. IMMUNIZATION basics Project.  
4 345 Geneva World Heal Organ. 2009;
- 6 346 16. Organization GWH. Rotavirus vaccines: WHO position paper - July 2021. Wkly  
7 347 Epidemiol Rec. 96 (28):301–219.
- 9 348 17. Mandomando I, Mumba M, Nsiari-muzeyi Biey J, Kipese Paluku G, Weldegebriel G,  
10 349 Mwenda JM. Implementation of the World Health Organization recommendation on  
11 350 the use of rotavirus vaccine without age restriction by African countries. *Vaccine*. 2021  
12 351 May 27;39(23):3111–9.
- 14 352 18. World Health Organization. Immunization Agenda 2030: A Global Strategy to Leave  
15 353 No One Behind [Internet]. 2020 [cited 2021 Feb 22]. Available from:  
16 354 <https://www.who.int/teams/immunization-vaccines-and-biologicals/strategies/ia2030>
- 18 355 19. World Health Organization. Table 2 : Summary of WHO Position Papers -  
19 356 Recommended Routine Immunizations for Children [Internet]. 2020. Available from:  
20 357 [https://www.who.int/docs/default-](https://www.who.int/docs/default-source/immunization/immunization_schedules/immunization-routine-table2)  
21 358 [source/immunization/immunization\\_schedules/immunization-routine-table2](https://www.who.int/docs/default-source/immunization/immunization_schedules/immunization-routine-table2)
- 23 359 20. Establishing and strengthening immunization in the second year of life : Practices for  
24 360 vaccination beyond infancy [Internet]. Geneva: World Health Organization. 2018 [cited  
25 361 2021 Oct 28]. Available from:  
26 362 <https://apps.who.int/iris/bitstream/handle/10665/260556/9789241513678-eng.pdf>
- 29 363 21. Standards for improving the quality of care for children and young adolescents in  
30 364 health facilities [Internet]. Geneva: World Health Organization. 2018 [cited 2021 Oct  
31 365 28]. p. 118. Available from: <https://www.who.int/publications/i/item/9789241565554>
- 33 366 22. Integrated management of childhood illness: caring for newborns and children in the  
34 367 community. [Internet]. Geneva: World Health Organization. 2011 [cited 2021 Sep 18].  
35 368 Available from: <https://apps.who.int/iris/handle/10665/44398>
- 37 369 23. Hanson CM, Mirza I, Kumapley R, Ogbuanu I, Kezaala R, Nandy R. Enhancing  
38 370 immunization during second year of life by reducing missed opportunities for  
39 371 vaccinations in 46 countries. *Vaccine*. 2018 May 31;36(23):3260–8.
- 41 372 24. Albaugh N, Mathew J, Choudhary R, Sitaraman S, Tomar A, Bajwa IK, et al.  
42 373 Determining the burden of missed opportunities for vaccination among children  
43 374 admitted in healthcare facilities in India: a cross-sectional study. *BMJ Open*. 2021 Mar  
44 375 1;11(3):e046464.
- 46 376 25. Rainey JJ, Lacapère F, Danovaro-Holliday MC, Mung K, Magloire R, Kananda G, et  
47 377 al. Vaccination Coverage in Haiti: Results from the 2009 National Survey. *Vaccine*.  
48 378 2012;30(9):1746–51.
- 50 379 26. Boschi-Pinto C, Labadie G, Dilip TR, Oliphant N, Dalglis SL, Aboubaker S, et al.  
51 380 Global implementation survey of Integrated Management of Childhood Illness (IMCI):  
52 381 20 years on. *BMJ Open*. 2018 Jul 1;8(7):e019079.
- 54 382 27. Wallace AS, Willis F, Nwaze E, Dieng B, Sipilanyambe N, Daniels D, et al. Vaccine  
55 383 wastage in Nigeria: An assessment of wastage rates and related vaccinator knowledge,  
56 384 attitudes and practices. *Vaccine*. 2017 Dec 4;35(48):6751–8.
- 58 385 28. Wallace AS, Krey K, Hustedt J, Burnett E, Choun N, Daniels D, et al. Assessment of  
59 386 vaccine wastage rates, missed opportunities, and related knowledge, attitudes and

- 1  
2  
3 387 practices during introduction of a second dose of measles-containing vaccine into  
4 388 Cambodia's national immunization program. *Vaccine*. 2018 Jul 16;36(30):4517–24.
- 5  
6 389 29. Gil Cuesta J, Whitehouse K, Kaba S, Nanan-N'Zeth K, Haba B, Bachy C, et al. 'When  
7 390 you welcome well, you vaccinate well': a qualitative study on improving vaccination  
8 391 coverage in urban settings in Conakry, Republic of Guinea. *Int Health*. 2020 Jan  
9 392 13;00:1–8.
- 10  
11 393 30. Jaca A, Mathebula L, Iweze A, Pienaar E, Wiysonge CS. A systematic review of  
12 394 strategies for reducing missed opportunities for vaccination. *Vaccine*.  
13 395 2018;36(21):2921–7.
- 14  
15 396 31. Restrepo-Méndez MC, Barros AJD, Wong KLM, Johnson HL, Pariyo G, Wehrmeister  
16 397 FC, et al. Missed opportunities in full immunization coverage: Findings from low- and  
17 398 lower-middle-income countries. *Glob Health Action*. 2016 Dec 1;9(1):30963.
- 19  
20 399 32. Practical guide for the design, use and promotion of home-based records in  
21 400 immunization programmes [Internet]. Geneva: World Health Organization. 2015 [cited  
22 401 2021 Oct 28]. Available from:  
23 402 [https://apps.who.int/iris/bitstream/handle/10665/175905/WHO\\_IVB\\_15.05\\_eng.pdf?se](https://apps.who.int/iris/bitstream/handle/10665/175905/WHO_IVB_15.05_eng.pdf?sequence=2&isAllowed=y)  
24 403 [quence=2&isAllowed=y](https://apps.who.int/iris/bitstream/handle/10665/175905/WHO_IVB_15.05_eng.pdf?sequence=2&isAllowed=y)
- 26 404 33. 2017 Assessment Report of the Global Vaccine Action Plan. Strategic Advisory Group  
27 405 of Experts on Immunization. [Internet]. Geneva: World Health Organization. 2017  
28 406 [cited 2021 Oct 28]. Available from:  
29 407 [https://www.who.int/immunization/web\\_2017\\_sage\\_gvap\\_assessment\\_report\\_en.pdf?u](https://www.who.int/immunization/web_2017_sage_gvap_assessment_report_en.pdf?ua=1)  
30 408 [a=1](https://www.who.int/immunization/web_2017_sage_gvap_assessment_report_en.pdf?ua=1)
- 32 409 34. Fatiregun AA, Lochlainn LN, Kaboré L, Dosumu M, Isere E, Olaoye I, et al. Missed  
33 410 opportunities for vaccination among children aged 0–23 months visiting health  
34 411 facilities in a southwest State of Nigeria, December 2019. Pakhare AP, editor. *PLoS*  
35 412 *One*. 2021 Aug 27;16(8):e0252798.
- 37 413 35. Ndwandwe D, Uthman OA, Adamu AA, Sambala EZ, Wiyeh AB, Olukade T, et al.  
38 414 Decomposing the gap in missed opportunities for vaccination between poor and non-  
39 415 poor in sub-Saharan Africa: A Multicountry Analyses. *Hum Vaccin Immunother*.  
40 416 2018;14(10):2358–64.
- 42  
43 417 36. Olorunsaiye CZ, Langhamer MS, Wallace AS, Watkins ML. Missed opportunities and  
44 418 barriers for vaccination: a descriptive analysis of private and public health facilities in  
45 419 four African countries. *Pan Afr Med J*. 2017;27(Suppl 3):6.
- 47 420 37. Cuesta JG, Mukembe N, Valentiner-Branth P, Stefanoff P, Lenglet A, Lenglet A.  
48 421 Measles Vaccination Coverage Survey in Moba, Katanga, Democratic Republic of  
49 422 Congo, 2013: Need to Adapt Routine and Mass Vaccination Campaigns to Reach the  
50 423 Unreached. *PLoS Curr*. 2015 Feb  
51 424 2;7(ecurrents.outbreaks.8a1b00760dfd81481eb42234bd18ced3).
- 53 425 38. Second round of the national pulse survey on continuity of essential health services  
54 426 during the COVID-19 pandemic: January-March 2021: interim report, 22 April 2021.  
55 427 [Internet]. Geneva: World Health Organization. 2021 [cited 2021 Oct 28]. Available  
56 428 from: <https://apps.who.int/iris/handle/10665/340937>
- 58 429 39. COVID-19 pandemic leads to major backsliding on childhood vaccinations, new  
59 430 WHO, UNICEF data shows [Internet]. [cited 2022 Mar 19]. Available from:

1  
2  
3 431 [https://www.who.int/news/item/15-07-2021-covid-19-pandemic-leads-to-major-](https://www.who.int/news/item/15-07-2021-covid-19-pandemic-leads-to-major-backsliding-on-childhood-vaccinations-new-who-unicef-data-shows)  
4 432 [backsliding-on-childhood-vaccinations-new-who-unicef-data-shows](https://www.who.int/news/item/15-07-2021-covid-19-pandemic-leads-to-major-backsliding-on-childhood-vaccinations-new-who-unicef-data-shows)  
5  
6 433

7  
8 434 Figure 1. Flow chart of participants' inclusion and for determining Missed Opportunities for  
9  
10 435 Vaccination (MOV), MSF-supported health facilities, 2011-2015  
11

12 436 Figure 2. Immunization schedule to ascertain MOV  
13  
14  
15  
16  
17  
18  
19  
20  
21  
22  
23  
24  
25  
26  
27  
28  
29  
30  
31  
32  
33  
34  
35  
36  
37  
38  
39  
40  
41  
42  
43  
44  
45  
46  
47  
48  
49  
50  
51  
52  
53  
54  
55  
56  
57  
58  
59  
60

For peer review only

Figure 1. Flow chart of participants' inclusion and for determining Missed Opportunities for Vaccination (MOV), MSF-supported health facilities, 2011-2015

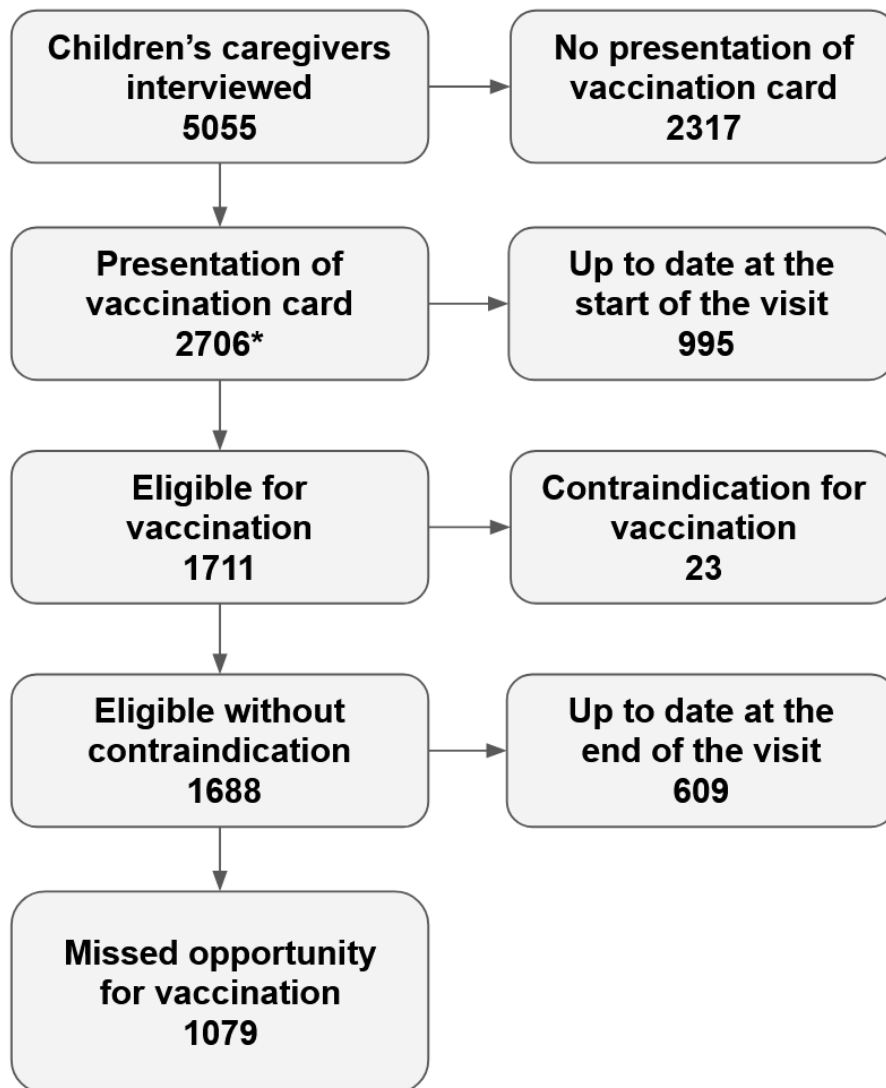

\*32 children were not included due to data inconsistencies.

**Figure 2. Immunization schedule to ascertain MOV**

| Vaccine                                                   | Recommended age                 |
|-----------------------------------------------------------|---------------------------------|
| <b>Birth dose</b>                                         |                                 |
| BCG <sup>1</sup>                                          | At birth – up to 12 months      |
| OPV <sup>2</sup>                                          | At birth – up to 2 weeks        |
| Hepatitis B vaccine                                       | At birth – up to 2 weeks        |
| <b>First dose</b>                                         |                                 |
| OPV                                                       | From 6 weeks                    |
| Pentavalent vaccine <sup>3</sup>                          | From 6 weeks                    |
| PCV <sup>4</sup>                                          | From 6 weeks                    |
| Rotavirus                                                 | From 6 weeks - up to 12 months  |
| Minimum interval of 4 weeks between First and Second dose |                                 |
| <b>Second dose</b>                                        |                                 |
| OPV                                                       | From 10 weeks                   |
| Pentavalent vaccine                                       | From 10 weeks                   |
| PCV                                                       | From 10 weeks                   |
| Rotavirus                                                 | From 10 weeks - up to 12 months |
| Minimum interval of 4 weeks between Second and Third dose |                                 |
| <b>Third dose</b>                                         |                                 |
| OPV                                                       | From 14 weeks                   |
| Pentavalent vaccine                                       | From 14 weeks                   |
| PCV                                                       | From 14 weeks                   |
| Measles-containing vaccine <sup>5</sup>                   | From 9 months                   |
| Yellow Fever <sup>6</sup>                                 | From 9 months                   |

<sup>1</sup>BCG: bacille Calmette-Guerin vaccine.

<sup>2</sup>OPV: Oral poliovirus vaccine. Inactivated poliovirus vaccine was not considered for MOV.

<sup>3</sup>Pentavalent vaccine: Diphtheria-tetanus-pertussis-hepatitis B- *Haemophilus influenzae* type b vaccine.

<sup>4</sup>PCV: Pneumococcal conjugate vaccine.

<sup>5</sup>Only one dose of Measles containing vaccine was considered for MOV.

<sup>6</sup>Yellow Fever was considered for MOV only in endemic countries.



Rec :

**Evaluation of missed vaccination opportunities: child questionnaire**

District: ..... Team: ..... N° child:

Center: ..... Date: ..... / ..... / ..... Age of the child: ..... years ..... months

1) Do you have a vaccination card or a health book for the child?

No  Yes → Did you bring it today?  No  Yes

2) What was the main purpose of your visit to the health center today? (One answer only)

- Curative consultation
- Vaccination
- MCH consultation
- Feeding program
- Accompanying an adult
- Other: .....

3) Vaccination status:

Write the **dates** (dd/mm/yy) mentioned in the health book **and circle it** if vaccine given today.  
If the history of vaccination is only confirmed orally by the caretaker, write **H**.  
**Cross** the box (X) for the missing dose of vaccine that could have been given today.

|                  | Dose 0 | Dose 1 | Dose 2 | Dose 3 |
|------------------|--------|--------|--------|--------|
| BCG              |        |        |        |        |
| HepB birth dose  |        |        |        |        |
| Polio            |        |        |        |        |
| DTP - HepB - Hib |        |        |        |        |
| PCV 13           |        |        |        |        |
| Rota             |        |        |        |        |
| Measles          |        |        |        |        |
| Yellow fever     |        |        |        |        |

4) Was the child eligible for a vaccine today?

No → Do you know the date of your next vaccination?  No  Yes → **END**

Yes → Did the child present with a true contra-indication to the vaccination today?  
 No  Yes → **GO TO QUESTION 6**

5) Did the child receive all vaccines required today?

Yes  
(If X in box)  No → Would you have accepted the vaccination today if proposed?  
 Yes  No → Why? .....

→ Reason(s) for not receiving all vaccines today? (One answer only)

- Out of stock
- No vaccinator
- Waiting time too long
- Not enough information
- Don't know the reason
- Other: .....

6) Did you get an appointment for your next vaccination?  No  Yes

**THANK YOU FOR YOUR PARTICIPATION!**

**Supplementary Table 1. Characteristics of interviewed children by presentation of vaccination card. MSF-supported health facilities (2011-2015)**

|                        | Total<br>N | Presentation of vaccination card <sup>d</sup> |      |      |      | <i>p</i> value      |
|------------------------|------------|-----------------------------------------------|------|------|------|---------------------|
|                        |            | No                                            |      | Yes  |      |                     |
|                        | N          | N                                             | %    | N    | %    |                     |
| <b>Age groups</b>      |            |                                               |      |      |      |                     |
| <12 m                  | 2742       | 906                                           | 33.0 | 1836 | 67.0 |                     |
| 12-23 m                | 1263       | 665                                           | 52.7 | 598  | 47.4 |                     |
| 24-59 m                | 1050       | 746                                           | 71.1 | 304  | 29.0 | <0.001 <sup>a</sup> |
| <b>Eligible</b>        |            |                                               |      |      |      |                     |
| No                     | 2276       | 1258                                          | 55.3 | 1018 | 44.7 |                     |
| Yes                    | 2779       | 1059                                          | 38.1 | 1720 | 61.9 | <0.001 <sup>b</sup> |
| <b>MOV<sup>c</sup></b> |            |                                               |      |      |      |                     |
| No                     | 2985       | 1358                                          | 45.5 | 1627 | 54.5 |                     |
| Yes                    | 2070       | 959                                           | 46.3 | 1111 | 53.7 | 0.558 <sup>b</sup>  |
| <b>Total</b>           | 5055       | 2317                                          | 45.8 | 2738 | 54.2 |                     |

% Row percentages

<sup>a</sup> Fisher exact test

<sup>b</sup> Chi square test

<sup>c</sup> MOV over the eligible children without contraindication for vaccination

<sup>d</sup> Vaccination history was obtained by presentation of vaccination card or oral history.

**Supplementary Table 2. Children who visited MSF-supported health facilities by country (2011-2015)**

| Country                          | Children with vaccination card |                | Eligible with no contraindication |                | MOV         |                |
|----------------------------------|--------------------------------|----------------|-----------------------------------|----------------|-------------|----------------|
|                                  | n                              | % <sup>a</sup> | n                                 | % <sup>b</sup> | n           | % <sup>c</sup> |
| Afghanistan                      | 33                             | 1.2            | 11                                | 33.3           | 8           | 72.7           |
| Democratic Republic of the Congo | 79                             | 2.9            | 41                                | 51.9           | 26          | 63.4           |
| Mauritania                       | 244                            | 9.0            | 158                               | 64.8           | 118         | 74.7           |
| Niger                            | 1888                           | 69.8           | 1073                              | 56.8           | 851         | 79.3           |
| Pakistan                         | 15                             | 0.6            | 8                                 | 53.3           | 1           | 12.5           |
| South Sudan                      | 447                            | 16.5           | 397                               | 88.8           | 75          | 18.9           |
| <b>Total</b>                     | <b>2706</b>                    | <b>100.0</b>   | <b>1688</b>                       | <b>62.4</b>    | <b>1079</b> | <b>63.9</b>    |

<sup>a</sup> Column percentage

<sup>b</sup> Row percentage among children with vaccination card

<sup>c</sup> Row percentage among eligible children without contraindication

**Supplementary Table 3. Characteristics of children with MOV irrespective of the possession of vaccination card. MSF-supported health facilities (2011-2015)**

|              | MOV <sup>a</sup> |             |             |             | p value            |
|--------------|------------------|-------------|-------------|-------------|--------------------|
|              | No               |             | Yes         |             |                    |
|              | N                | %           | N           | %           |                    |
| Age groups   |                  |             |             |             |                    |
| <12 m        | 588              | 33.2        | 1182        | 66.8        |                    |
| 12-23 m      | 66               | 11.6        | 504         | 88.4        |                    |
| 24-59 m      | 55               | 12.5        | 384         | 87.5        | 0.001 <sup>b</sup> |
| <b>Total</b> | <b>709</b>       | <b>25.5</b> | <b>2070</b> | <b>74.5</b> |                    |

<sup>a</sup> MOV over the eligible children without contraindication for vaccination

<sup>b</sup> Fisher

1  
2  
3  
4  
5  
6  
7  
8  
9  
10  
11  
12  
13  
14  
15  
16  
17  
18  
19  
20  
21  
22  
23  
24  
25  
26  
27  
28  
29  
30  
31  
32  
33  
34  
35  
36  
37  
38  
39  
40  
41  
42  
43  
44  
45  
46  
47  
48  
49  
50  
51  
52  
53  
54  
55  
56  
57  
58  
59  
60STROBE Statement—Checklist of items that should be included in reports of *cross-sectional studies*

|                              | Item No | Recommendation                                                                                                                                                                                               | Page No |
|------------------------------|---------|--------------------------------------------------------------------------------------------------------------------------------------------------------------------------------------------------------------|---------|
| <b>Title and abstract</b>    | 1       | (a) Indicate the study's design with a commonly used term in the title or the abstract                                                                                                                       | 2       |
|                              |         | (b) Provide in the abstract an informative and balanced summary of what was done and what was found                                                                                                          | 2       |
| <b>Introduction</b>          |         |                                                                                                                                                                                                              |         |
| Background/rationale         | 2       | Explain the scientific background and rationale for the investigation being reported                                                                                                                         | 4       |
| Objectives                   | 3       | State specific objectives, including any prespecified hypotheses                                                                                                                                             | 4       |
| <b>Methods</b>               |         |                                                                                                                                                                                                              |         |
| Study design                 | 4       | Present key elements of study design early in the paper                                                                                                                                                      | 5       |
| Setting                      | 5       | Describe the setting, locations, and relevant dates, including periods of recruitment, exposure, follow-up, and data collection                                                                              | 5       |
| Participants                 | 6       | (a) Give the eligibility criteria, and the sources and methods of selection of participants                                                                                                                  | 5       |
| Variables                    | 7       | Clearly define all outcomes, exposures, predictors, potential confounders, and effect modifiers. Give diagnostic criteria, if applicable                                                                     | 5-7     |
| Data sources/<br>measurement | 8*      | For each variable of interest, give sources of data and details of methods of assessment (measurement). Describe comparability of assessment methods if there is more than one group                         | 5-7     |
| Bias                         | 9       | Describe any efforts to address potential sources of bias                                                                                                                                                    | 6-7     |
| Study size                   | 10      | Explain how the study size was arrived at                                                                                                                                                                    | NA      |
| Quantitative variables       | 11      | Explain how quantitative variables were handled in the analyses. If applicable, describe which groupings were chosen and why                                                                                 | 6-7     |
| Statistical methods          | 12      | (a) Describe all statistical methods, including those used to control for confounding                                                                                                                        | 7       |
|                              |         | (b) Describe any methods used to examine subgroups and interactions                                                                                                                                          | 7       |
|                              |         | (c) Explain how missing data were addressed                                                                                                                                                                  | 6       |
|                              |         | (d) If applicable, describe analytical methods taking account of sampling strategy                                                                                                                           | NA      |
|                              |         | (e) Describe any sensitivity analyses                                                                                                                                                                        | NA      |
| <b>Results</b>               |         |                                                                                                                                                                                                              |         |
| Participants                 | 13*     | (a) Report numbers of individuals at each stage of study—eg numbers potentially eligible, examined for eligibility, confirmed eligible, included in the study, completing follow-up, and analysed            | 8       |
|                              |         | (b) Give reasons for non-participation at each stage                                                                                                                                                         | 8       |
|                              |         | (c) Consider use of a flow diagram                                                                                                                                                                           | 6       |
| Descriptive data             | 14*     | (a) Give characteristics of study participants (eg demographic, clinical, social) and information on exposures and potential confounders                                                                     | 8       |
|                              |         | (b) Indicate number of participants with missing data for each variable of interest                                                                                                                          | NA      |
| Outcome data                 | 15*     | Report numbers of outcome events or summary measures                                                                                                                                                         | 8       |
| Main results                 | 16      | (a) Give unadjusted estimates and, if applicable, confounder-adjusted estimates and their precision (eg, 95% confidence interval). Make clear which confounders were adjusted for and why they were included | 9-10    |

|                          |    |                                                                                                                                                                            |    |
|--------------------------|----|----------------------------------------------------------------------------------------------------------------------------------------------------------------------------|----|
|                          |    | (b) Report category boundaries when continuous variables were categorized                                                                                                  | 10 |
|                          |    | (c) If relevant, consider translating estimates of relative risk into absolute risk for a meaningful time period                                                           | NA |
| Other analyses           | 17 | Report other analyses done—eg analyses of subgroups and interactions, and sensitivity analyses                                                                             | NA |
| <b>Discussion</b>        |    |                                                                                                                                                                            |    |
| Key results              | 18 | Summarise key results with reference to study objectives                                                                                                                   | 11 |
| Limitations              | 19 | Discuss limitations of the study, taking into account sources of potential bias or imprecision. Discuss both direction and magnitude of any potential bias                 | 14 |
| Interpretation           | 20 | Give a cautious overall interpretation of results considering objectives, limitations, multiplicity of analyses, results from similar studies, and other relevant evidence | 14 |
| Generalisability         | 21 | Discuss the generalisability (external validity) of the study results                                                                                                      | NA |
| <b>Other information</b> |    |                                                                                                                                                                            |    |
| Funding                  | 22 | Give the source of funding and the role of the funders for the present study and, if applicable, for the original study on which the present article is based              | 16 |

\*Give information separately for exposed and unexposed groups.

**Note:** An Explanation and Elaboration article discusses each checklist item and gives methodological background and published examples of transparent reporting. The STROBE checklist is best used in conjunction with this article (freely available on the Web sites of PLoS Medicine at <http://www.plosmedicine.org/>, Annals of Internal Medicine at <http://www.annals.org/>, and Epidemiology at <http://www.epidem.com/>). Information on the STROBE Initiative is available at [www.strobe-statement.org](http://www.strobe-statement.org).
